# Supplementary material for: Discovery of Targets for Immune–Metabolic Antitumor Drugs Identifies Estrogen-Related Receptor Alpha
Source: PubMed Central journal article supplement — Cancer Discov. 2023 Feb 6;13(3):672–701. doi: 10.1158/2159-8290.CD-22-0244 (PMC9975674; doi:10.1158/2159-8290.cd-22-0244), 2023-02-06
Supplement: cd-22-0244_figure_s5_suppsf5.pdf [file cd-22-0244_figure_s5_suppsf5.pdf]

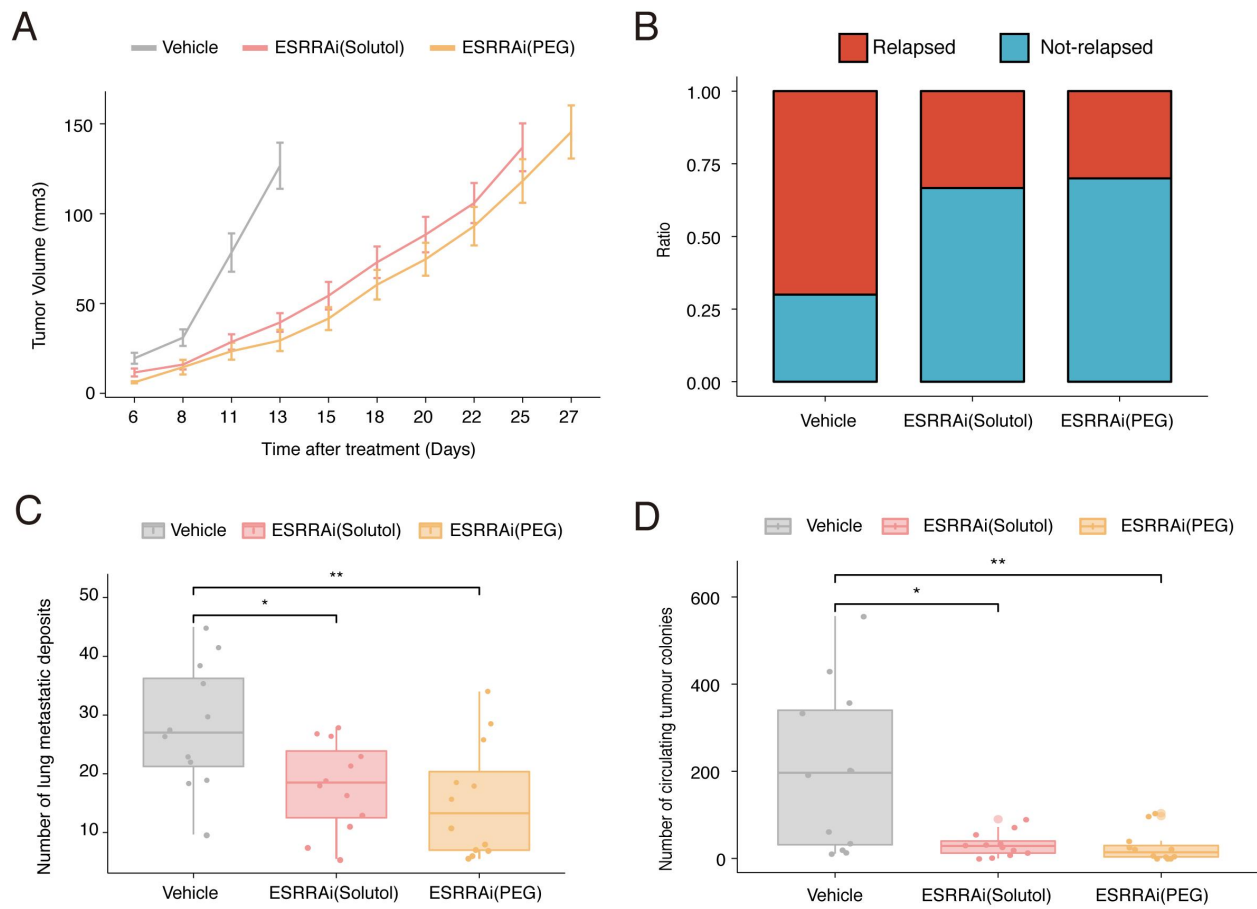

**Fig. S5. Robust *in vivo* antitumor elimination by ESRRRA inhibition.**

(A-D) Comparison of ESRRRAi efficacy in the 4T1 mouse model using two media (PEG and Solutol): tumor growth after the treatment (A), the ratio of relapsed mice after removing tumors (B), number of lung metastases (C), and number of circulating tumor cell colonies (D).
