# Supplementary material for: Discovery of Targets for Immune–Metabolic Antitumor Drugs Identifies Estrogen-Related Receptor Alpha
Source: PubMed Central journal article supplement — Cancer Discov. 2023 Feb 6;13(3):672–701. doi: 10.1158/2159-8290.CD-22-0244 (PMC9975674; doi:10.1158/2159-8290.cd-22-0244), 2023-02-06
Supplement: cd-22-0244_figure_s8_suppsf8.pdf [file cd-22-0244_figure_s8_suppsf8.pdf]

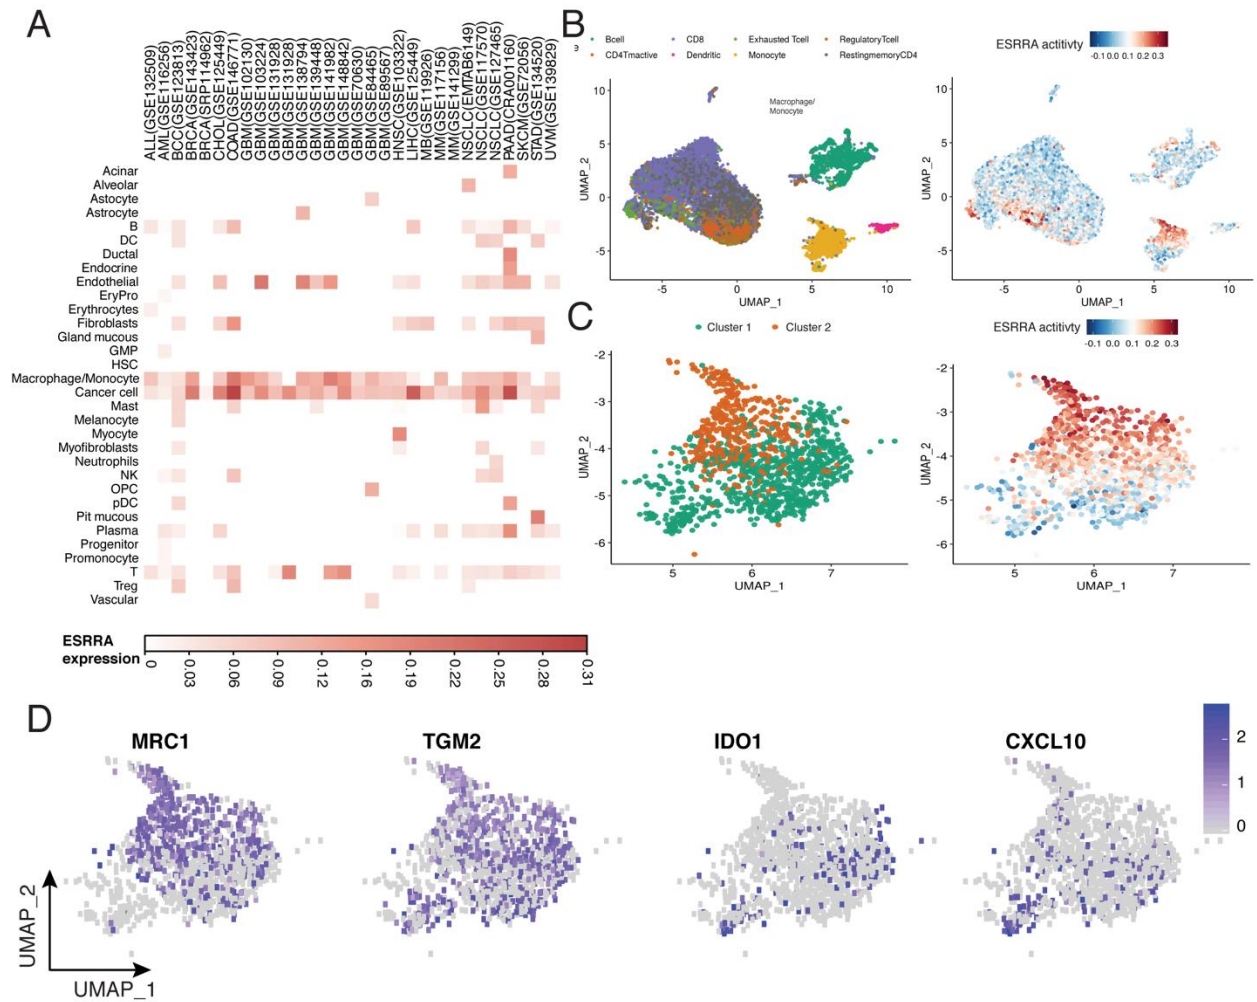

**Fig. S8.** The effect of ESRRR inhibition on tumor microenvironments at single-cell resolutions.

(A) ESRRR expression in cancer and immune cells of 30 scRNA-seq cohorts. Cancer types and GEO accession numbers are displayed for each cohort. (B) UMAP displays the cell types (left) and ESRRR activity (right) in CD45<sup>+</sup> single-cells in melanoma patients (Moshe et al.). (C) UMAP shows the clusters (left) and ESRRR activity (right) in the macrophage population. (D) Expression of M1 and M2 markers in two macrophage clusters. (M1 markers: *IDO1* and *CXCL10*; M2 markers: *MRC1* and *TGM2*)
