# Supplementary material for: Discovery of Targets for Immune–Metabolic Antitumor Drugs Identifies Estrogen-Related Receptor Alpha
Source: PubMed Central journal article supplement — Cancer Discov. 2023 Feb 6;13(3):672–701. doi: 10.1158/2159-8290.CD-22-0244 (PMC9975674; doi:10.1158/2159-8290.cd-22-0244), 2023-02-06
Supplement: cd-22-0244_figure_s10_suppsf10.pdf [file cd-22-0244_figure_s10_suppsf10.pdf]

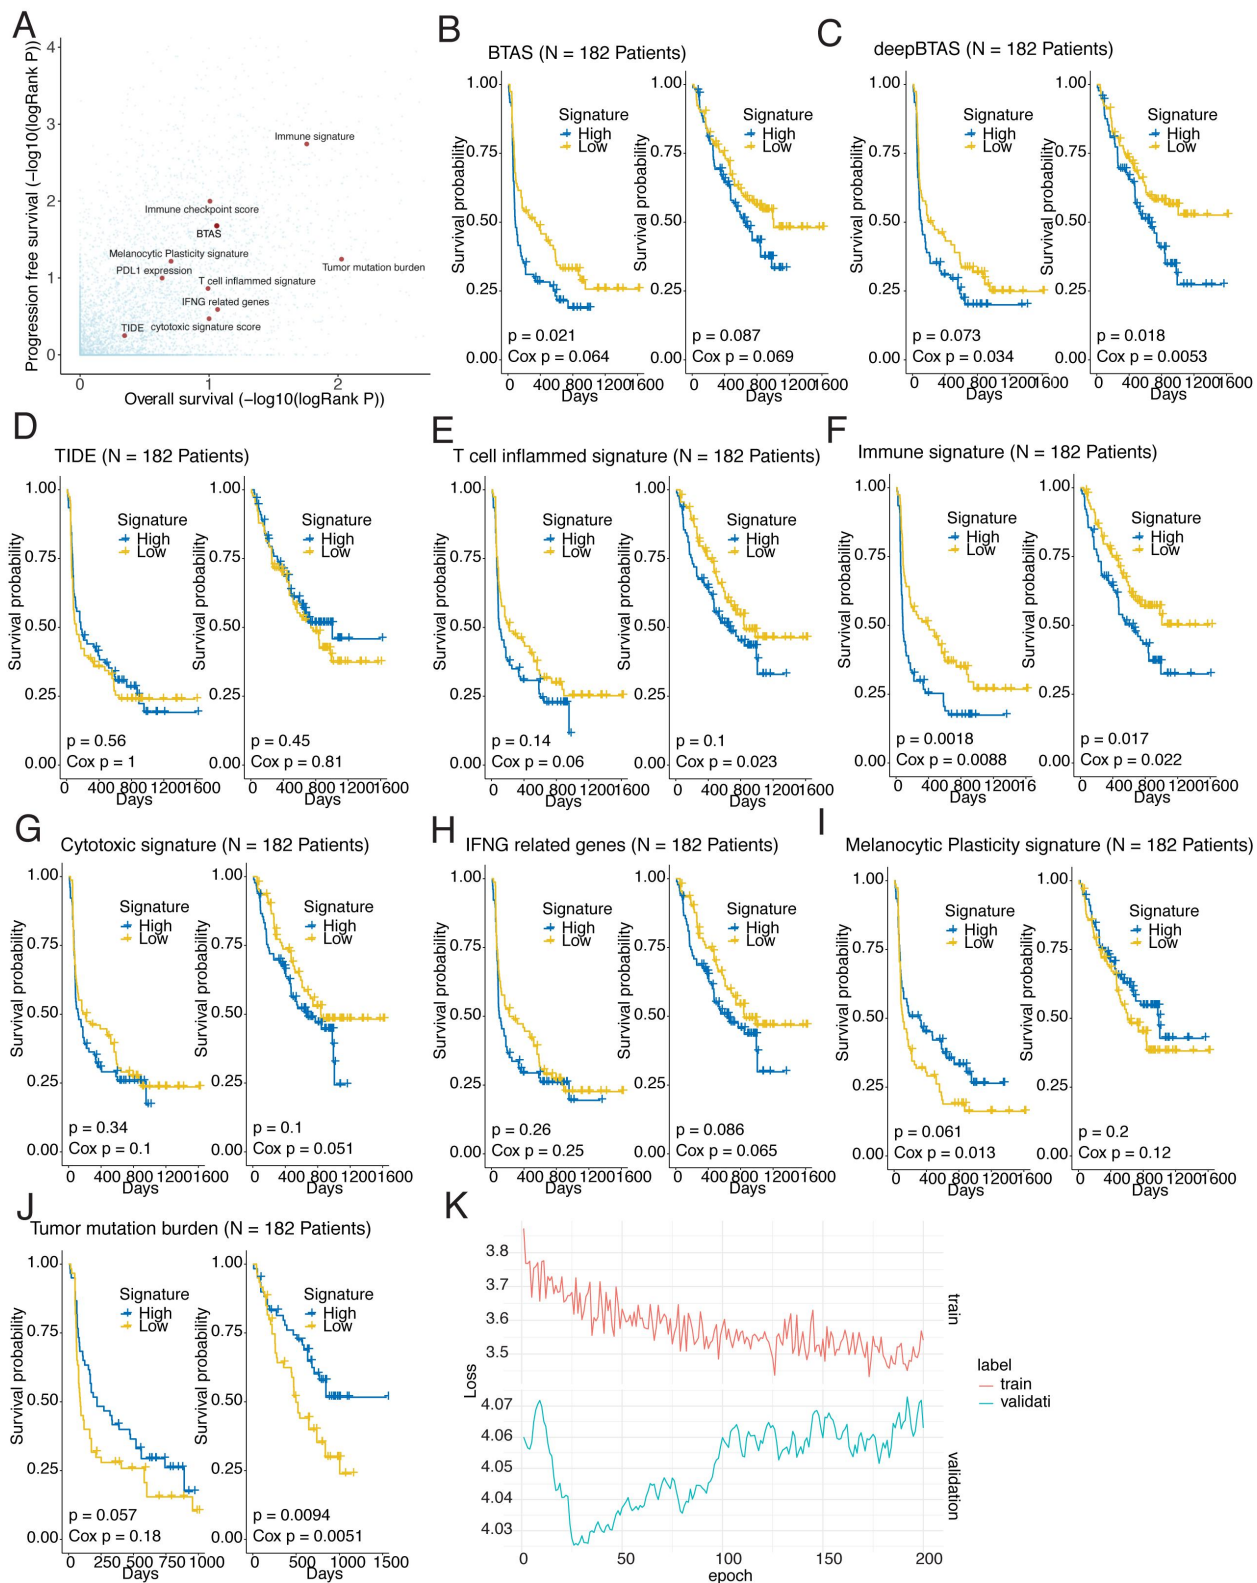

Fig. S10. Machine learning evaluation of immune-metabolic targets in predicting patient response to anti-PD1 monotherapy.

(A) Survival stratification performance of BTAS score versus seven other previously published biomarkers for melanoma patients receiving anti-PD1 only. (B-J) Kaplan–Meier plots showing progression-free survival and overall survival differences for patients receiving anti-PD1 between the low-risk and high-risk groups defined by the median value of signatures. Signatures displayed are: (B) BTAS, (C) deepBTAS, (D) TIDE (7), (E) T-cell inflamed (10), (F) Immune (11), (G) Cytotoxic(12), (H) IFNG (13), (I) Melanocytic plasticity (14), and (J) Tumor mutation burden. (K) deepBTAS training (top) and validation loss (bottom) on TCGA data with training epochs. Validation loss decreased till epoch 24, which is used for early stop criteria and the final model.
