# Supplementary material for: Discovery of Targets for Immune–Metabolic Antitumor Drugs Identifies Estrogen-Related Receptor Alpha
Source: PubMed Central journal article supplement — Cancer Discov. 2023 Feb 6;13(3):672–701. doi: 10.1158/2159-8290.CD-22-0244 (PMC9975674; doi:10.1158/2159-8290.cd-22-0244), 2023-02-06
Supplement: cd-22-0244_figure_s11_suppsf11.pdf [file cd-22-0244_figure_s11_suppsf11.pdf]

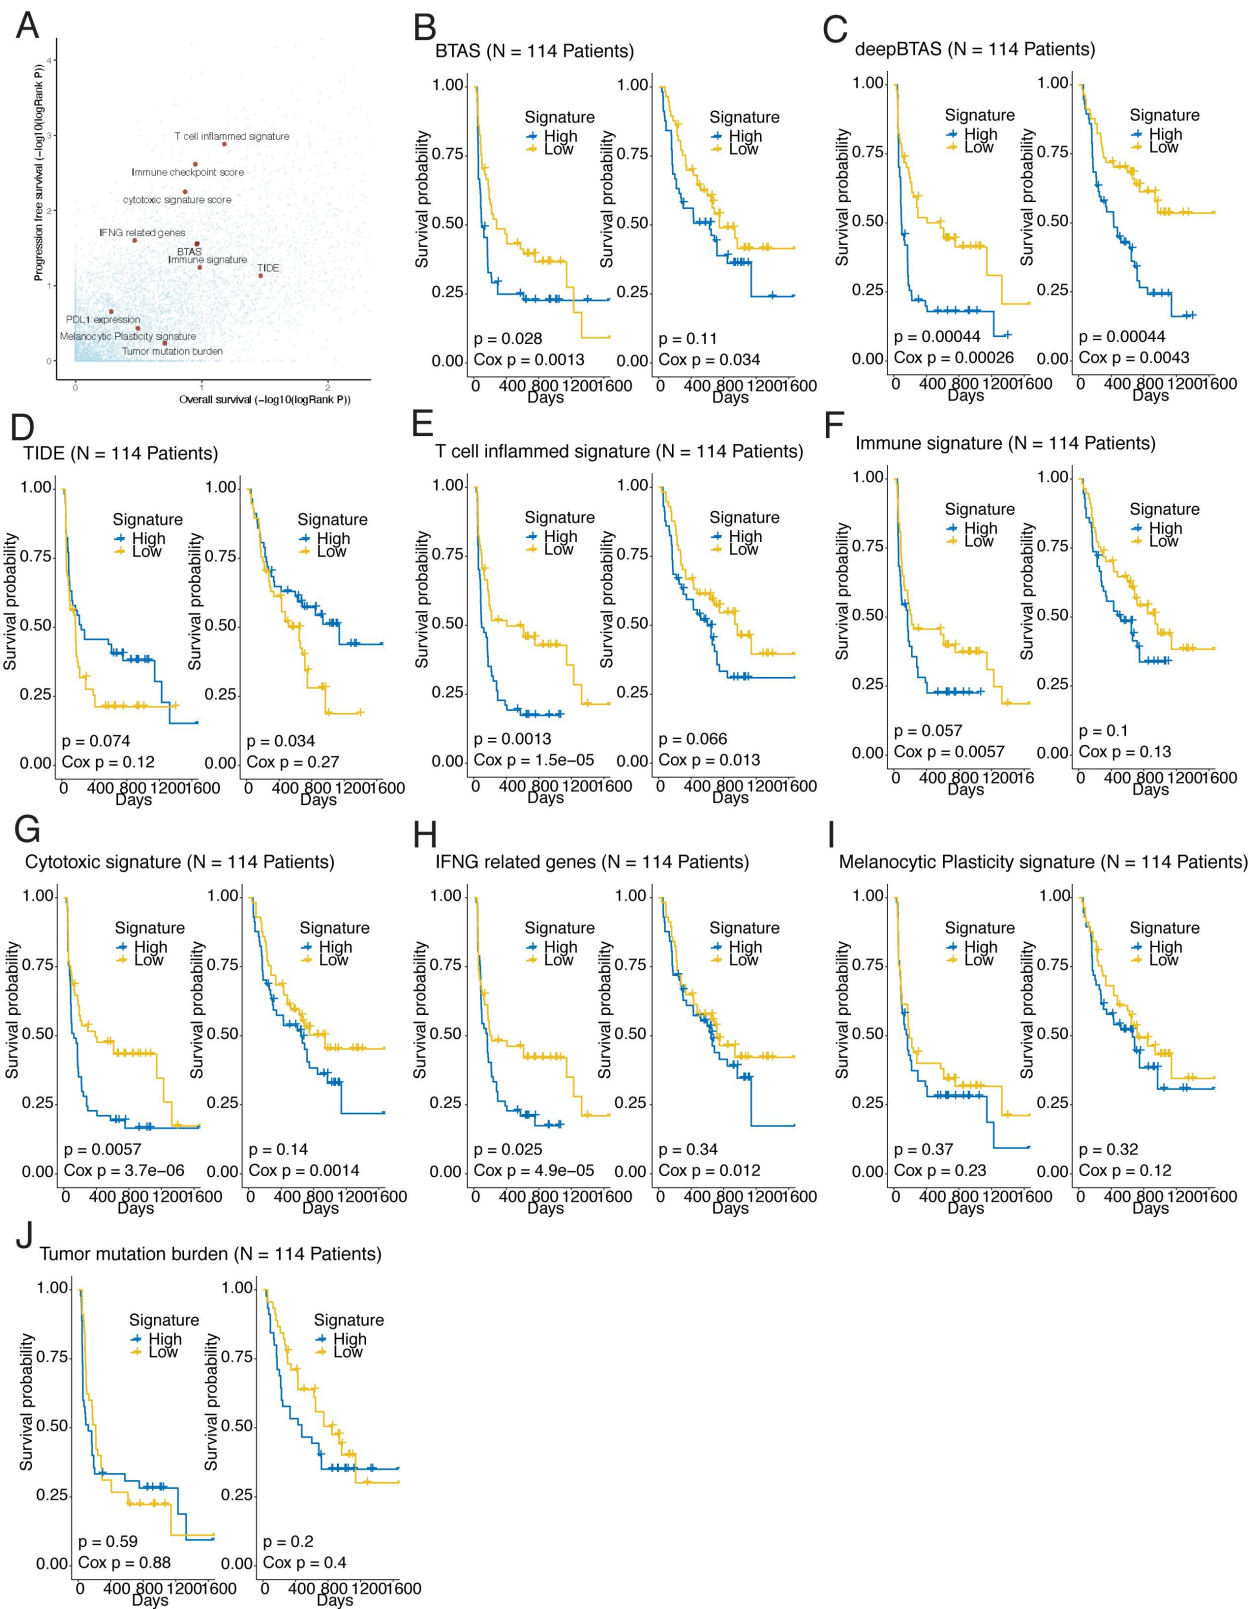

**Fig. S11. Machine learning evaluation of immune-metabolic targets in predicting patient response to anti-PD1 and anti-CTLA4 combination therapy.**

(A) Survival stratification performance of BTAS score versus seven other previously published biomarkers for melanoma patients receiving anti-PD1+anti-CTLA4 combo. (B-J) Kaplan-Meier plots showing

progression-free survival and overall survival differences for patients receiving anti-PD1 between the low-risk and high-risk groups defined by the median value of signatures. Signatures displayed are: **(B)** BTAS, **(C)** deepBTAS, **(D)** TIDE (7), **(E)** T-cell inflamed (10), **(F)** Immune (11), **(G)** Cytotoxic(12), **(H)** IFNG (13), **(I)** Melanocytic plasticity (14), and **(J)** Tumor mutation burden.
