# Supplementary material for: Discovery of Targets for Immune–Metabolic Antitumor Drugs Identifies Estrogen-Related Receptor Alpha
Source: PubMed Central journal article supplement — Cancer Discov. 2023 Feb 6;13(3):672–701. doi: 10.1158/2159-8290.CD-22-0244 (PMC9975674; doi:10.1158/2159-8290.cd-22-0244), 2023-02-06
Supplement: cd-22-0244_figure_s12_suppsf12.pdf [file cd-22-0244_figure_s12_suppsf12.pdf]

**A** Biomarker accuracy to classify ICB responders and non-responders

|                                         | AUC   |
|-----------------------------------------|-------|
| <i>deepBTAS</i>                         | 0.603 |
| <i>BTAS</i>                             | 0.585 |
| <i>Tumor mutation burden</i>            | 0.564 |
| <i>Melanocytic Plasticity signature</i> | 0.55  |
| <i>T cell inflamed signature</i>        | 0.591 |
| <i>Immune signature</i>                 | 0.602 |
| <i>PDL1 expression</i>                  | 0.551 |
| <i>Cytotoxic signature</i>              | 0.578 |
| <i>TIDE</i>                             | 0.521 |
| <i>IFNG related genes</i>               | 0.554 |
| <i>Immune checkpoint score</i>          | 0.569 |

**B** BTAS/biomarker association with progression-free survival

|                                         | BTAS  | Biomarker |
|-----------------------------------------|-------|-----------|
| <i>IFNG related genes</i>               | 0.004 | 0.007     |
| <i>TIDE</i>                             | 4e-04 | 0.7       |
| <i>Cytotoxic signature</i>              | 3e-04 | 0.5       |
| <i>PDL1 expression</i>                  | 3e-04 | 0.9       |
| <i>Immune signature</i>                 | 3e-04 | 0.9       |
| <i>T cell inflamed signature</i>        | 3e-04 | 0.8       |
| <i>Melanocytic Plasticity signature</i> | 0.001 | 0.03      |
| <i>Tumor mutation burden</i>            | 0.002 | 0.7       |

**C** BTAS/biomarker association with overall survival

|                                         | BTAS  | Biomarker |
|-----------------------------------------|-------|-----------|
| <i>IFNG related genes</i>               | 0.04  | 0.02      |
| <i>TIDE</i>                             | 0.007 | 0.7       |
| <i>Cytotoxic signature</i>              | 0.006 | 0.3       |
| <i>PDL1 expression</i>                  | 0.006 | 0.6       |
| <i>Immune signature</i>                 | 0.005 | 0.3       |
| <i>T cell inflamed signature</i>        | 0.006 | 0.9       |
| <i>Melanocytic Plasticity signature</i> | 0.02  | 0.003     |
| <i>Tumor mutation burden</i>            | 0.03  | 0.1       |

**D** deepBTAS/biomarker association with progression-free survival

|                                         | deepBTAS | Biomarker |
|-----------------------------------------|----------|-----------|
| <i>IFNG related genes</i>               | 0.004    | 0.03      |
| <i>TIDE</i>                             | 1e-04    | 0.8       |
| <i>Cytotoxic signature</i>              | 6e-05    | 0.4       |
| <i>PDL1 expression</i>                  | 7e-05    | 0.8       |
| <i>Immune signature</i>                 | 8e-05    | 1         |
| <i>T cell inflamed signature</i>        | 7e-05    | 0.8       |
| <i>Melanocytic Plasticity signature</i> | 3e-04    | 0.03      |
| <i>Tumor mutation burden</i>            | 5e-04    | 0.6       |

**E** deepBTAS/biomarker association with overall survival

|                                         | deepBTAS | Biomarker |
|-----------------------------------------|----------|-----------|
| <i>IFNG related genes</i>               | 0.003    | 0.1       |
| <i>TIDE</i>                             | 1e-04    | 0.8       |
| <i>Cytotoxic signature</i>              | 7e-05    | 0.2       |
| <i>PDL1 expression</i>                  | 9e-05    | 0.5       |
| <i>Immune signature</i>                 | 8e-05    | 0.3       |
| <i>T cell inflamed signature</i>        | 1e-04    | 0.7       |
| <i>Melanocytic Plasticity signature</i> | 5e-04    | 0.004     |
| <i>Tumor mutation burden</i>            | 0.002    | 0.1       |

**F** Biomarker performance improvement with BTAS addition (LRT P)

|                                         | PFS   | OS    |
|-----------------------------------------|-------|-------|
| <i>Immune signature</i>                 | 3e-04 | 0.005 |
| <i>Cytotoxic signature</i>              | 3e-04 | 0.006 |
| <i>PDL1 expression</i>                  | 3e-04 | 0.006 |
| <i>T cell inflamed signature</i>        | 3e-04 | 0.006 |
| <i>TIDE</i>                             | 4e-04 | 0.007 |
| <i>Melanocytic Plasticity signature</i> | 1e-03 | 0.020 |
| <i>Tumor mutation burden</i>            | 2e-03 | 0.030 |
| <i>IFNG related genes</i>               | 4e-03 | 0.040 |

**Fig. S12. deepBTAS improve the performance of current ICB biomarkers.**

(A) Predictive power of BTAS and deepBTAS versus other previously published ICB biomarkers in terms of AUCs to predict ICB response. (B-E) Significance of association of BTAS/deepBTAS with progression-free survival (PFS) or overall survival (OS) while accounting for levels of different biomarkers (Rows). Association estimated using a multivariable cox proportional hazard model with BTAS and biomarker. P-values displayed are significance of associations calculated using Wald's test. (F) Performance improvement (OS and PFS) with addition of BTAS to biomarkers (Rows). An improvement quantified as

(p-value of) increase in likelihood of multivariate model containing a biomarker and BTAS over model containing the biomarker alone.
