# Supplementary material for: Discovery of Targets for Immune–Metabolic Antitumor Drugs Identifies Estrogen-Related Receptor Alpha
Source: PubMed Central journal article supplement — Cancer Discov. 2023 Feb 6;13(3):672–701. doi: 10.1158/2159-8290.CD-22-0244 (PMC9975674; doi:10.1158/2159-8290.cd-22-0244), 2023-02-06
Supplement: cd-22-0244_figure_s13_suppsf13.pdf [file cd-22-0244_figure_s13_suppsf13.pdf]

### A Immune signature

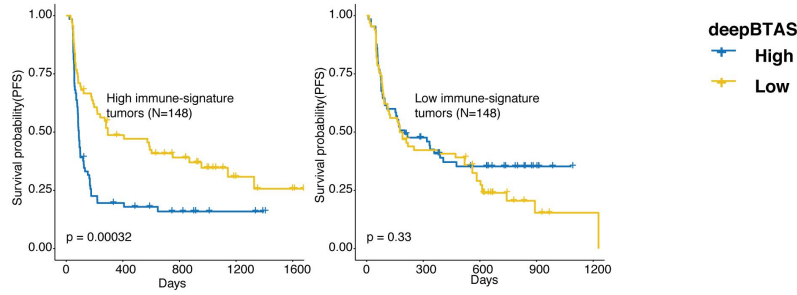

### B T cell inflamed signature

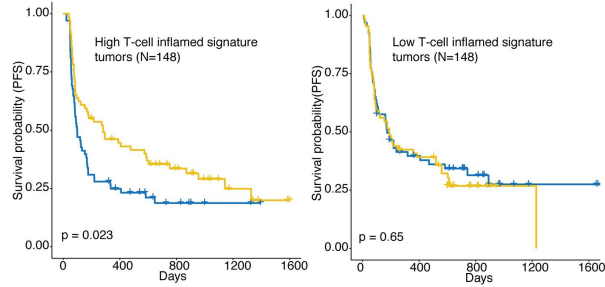

### C T cell inflamed signature

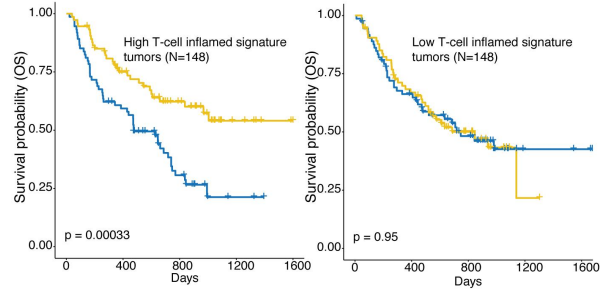

### D Cytotoxic signature

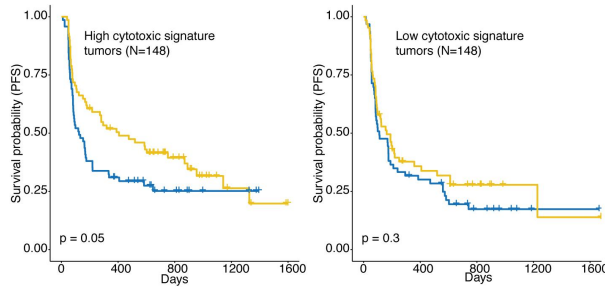

### E Cytotoxic signature

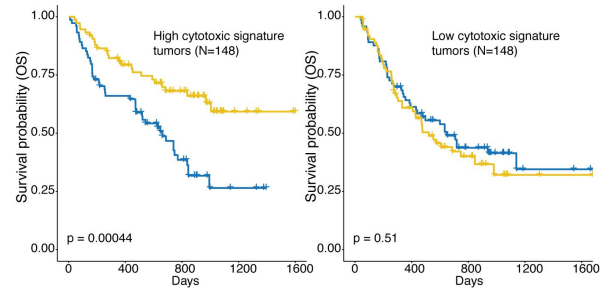

**Fig. S13.** Kaplan–Meier plots showing progression-free survival and overall survival differences for patients receiving anti-PD1 between the low-risk and high-risk groups defined by the median value of deepBTAS. The analysis done separately on tumors with high (right) and low (left) levels of biomarker. Analysis done for Immune (A), T cell inflamed (B-C), and Cytotoxic signature (D-E).
