# Supplementary material for: Discovery of Targets for Immune–Metabolic Antitumor Drugs Identifies Estrogen-Related Receptor Alpha
Source: PubMed Central journal article supplement — Cancer Discov. 2023 Feb 6;13(3):672–701. doi: 10.1158/2159-8290.CD-22-0244 (PMC9975674; doi:10.1158/2159-8290.cd-22-0244), 2023-02-06
Supplement: cd-22-0244_figure_s15_suppsf15.pdf [file cd-22-0244_figure_s15_suppsf15.pdf]

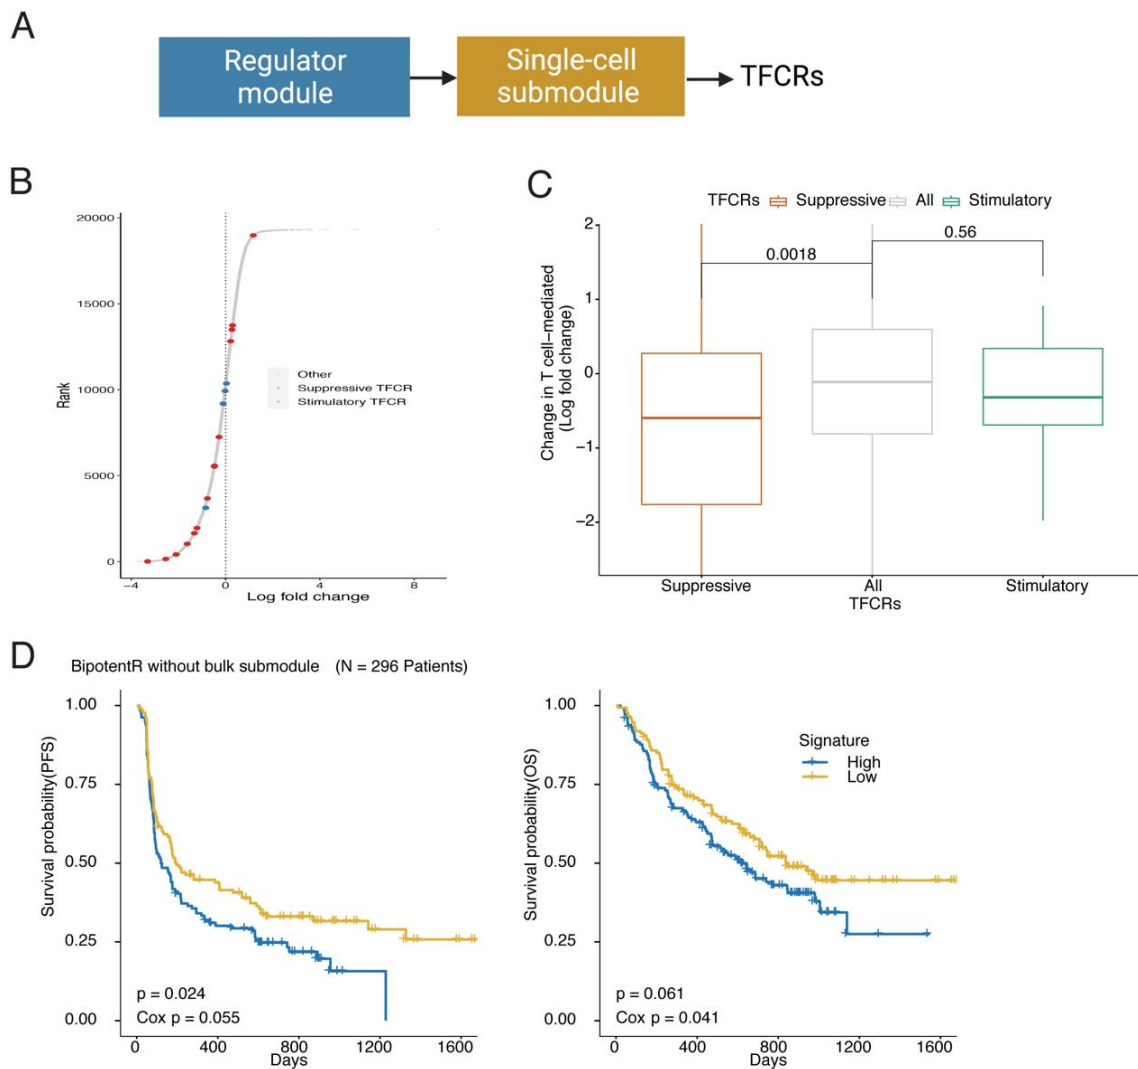

**Fig. S15. Evaluation of scRNA-BipotentR (BipotentR without bulk-tumor sub-module).**

(A) Method outline of scRNA-BipotentR. (B,C) Effect of knockout of target identified by scRNA-BipotentR on T-cell mediated killing of cancer cells in CRISPR experiments, displayed using rankplot (B) and boxplot (C). (D) Kaplan–Meier plots showing progression-free survival and overall survival differences for patients receiving anti-PD1 between the low-risk and high-risk groups defined by the median value of the tumor activity of targets (estimated using an approach similar to BTAS).
