# Supplementary material for: Discovery of Targets for Immune–Metabolic Antitumor Drugs Identifies Estrogen-Related Receptor Alpha
Source: PubMed Central journal article supplement — Cancer Discov. 2023 Feb 6;13(3):672–701. doi: 10.1158/2159-8290.CD-22-0244 (PMC9975674; doi:10.1158/2159-8290.cd-22-0244), 2023-02-06
Supplement: cd-22-0244_figure_s16_suppsf16.pdf [file cd-22-0244_figure_s16_suppsf16.pdf]

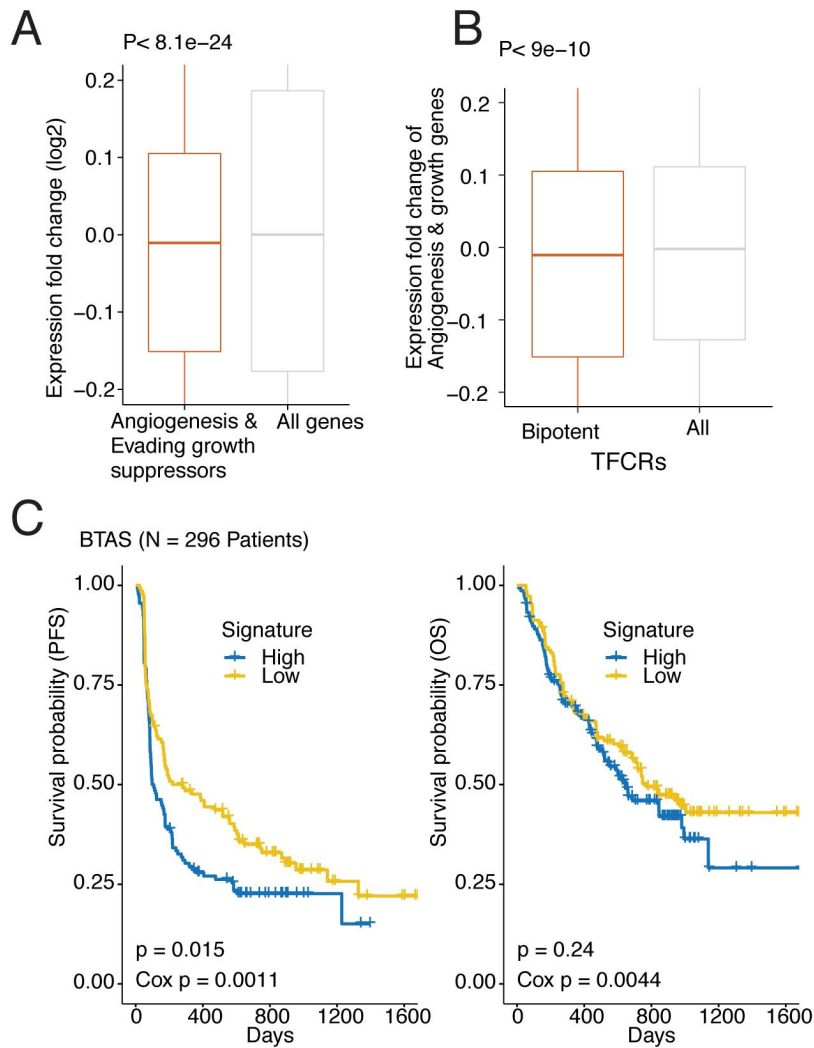

**Fig. S16. Validation of bipotent regulators of angiogenesis or growth-suppressor.**

(A) Effect of knockout of 28 bipotent targets (14 each of angiogenesis and growth-suppressor) on the expression of genes in angiogenesis or evasion of growth suppressor pathways vs. controls. (B) Expression change of genes in angiogenesis or evasion of growth suppressor pathways by knockout of bipotent TFCRs vs. other TFCRs. (C) Kaplan–Meier plots showing progression-free survival (left) and overall survival (right) differences for patients receiving anti-PD1 between the low-risk and high-risk groups defined by the median value of angiogenesis or growth-suppressor signature in BTAS.
