# Supplementary material for: Discovery of Targets for Immune–Metabolic Antitumor Drugs Identifies Estrogen-Related Receptor Alpha
Source: PubMed Central journal article supplement — Cancer Discov. 2023 Feb 6;13(3):672–701. doi: 10.1158/2159-8290.CD-22-0244 (PMC9975674; doi:10.1158/2159-8290.cd-22-0244), 2023-02-06
Supplement: cd-22-0244_figure_s17_suppsf17.pdf [file cd-22-0244_figure_s17_suppsf17.pdf]

A

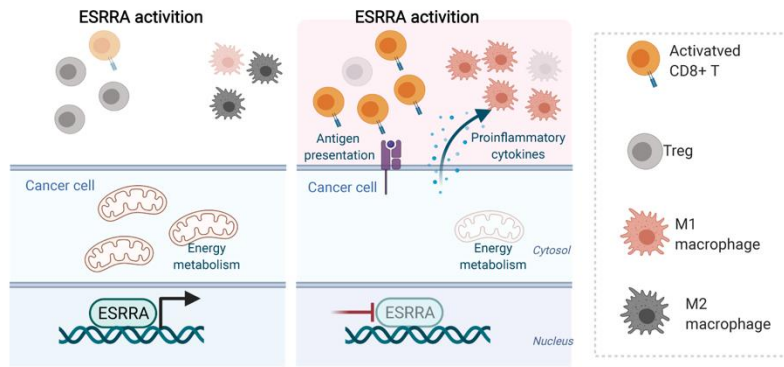

B

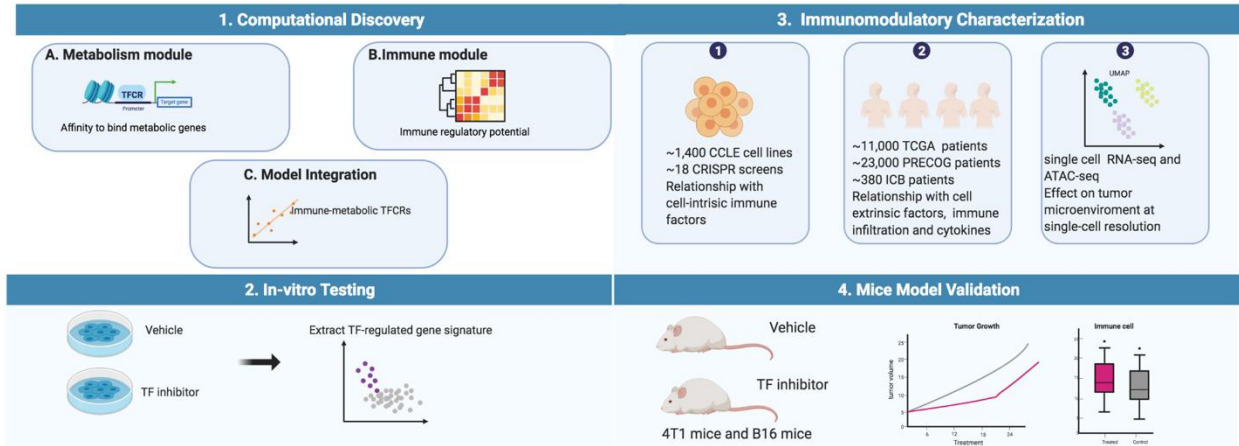

Fig. S17. Overall design.

(A) Effect of ESRRRAi in tumor microenvironments. ESRRRAi induces antigen presentation in cancer cells that in turn mobilizes CD8<sup>+</sup> T cells. ESRRRAi also induces M1-polarizing cytokines in cancer cells, which polarizes macrophages toward M1. (B) Overall schematic of the target discovery and validation platform of the study involving: computationally discover immune-metabolic regulators (BipotentR), determine effects of targeting an immune-metabolic regulator, and test those effects *in vitro* and *in vivo*.
