# Supplementary material for: Discovery of Targets for Immune–Metabolic Antitumor Drugs Identifies Estrogen-Related Receptor Alpha
Source: PubMed Central journal article supplement — Cancer Discov. 2023 Feb 6;13(3):672–701. doi: 10.1158/2159-8290.CD-22-0244 (PMC9975674; doi:10.1158/2159-8290.cd-22-0244), 2023-02-06
Supplement: cd-22-0244_figure_s18_suppsf18.pdf [file cd-22-0244_figure_s18_suppsf18.pdf]

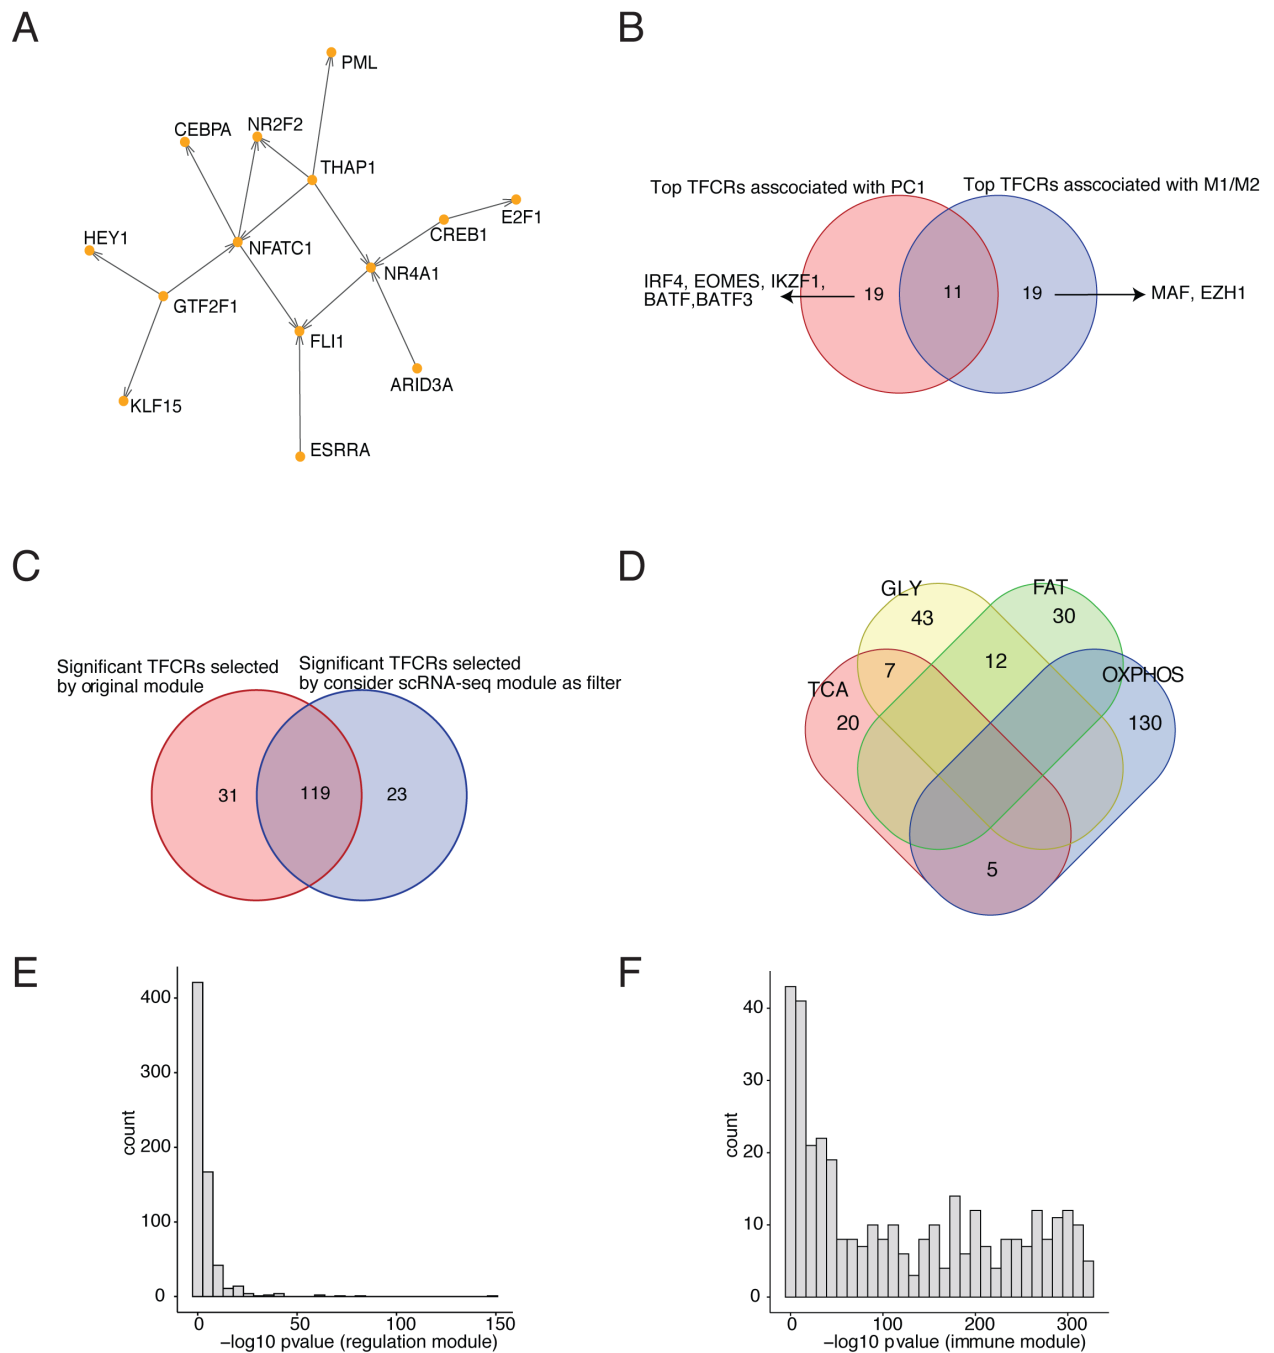

**Fig. S18. Evaluation of BipotentR.**

(A) Arrows directed from upstream TFCRs to their likely targets TFCRs, which were inferred using the knockTF database. (B) Overlap of top 30 significant TFCRs (adjusted p value<0.05) identified using M1/M2 or PC1. (C) Comparison of TFCRs identified by BipotentR immune-module and immune-module with scRNA sub-module as a filter. (D) Overlap among genes in the KEGG database metabolic pathways. GLY: glycolysis gluconeogenesis; FAT, fatty acid metabolism; TCA, citrate cycle TCA cycle; OXPPOS, oxidative phosphorylation. (E, F) Distribution of TFCR p-values of (E) regulation and (F) immune modules.
