# Supplementary material for: Discovery of Targets for Immune–Metabolic Antitumor Drugs Identifies Estrogen-Related Receptor Alpha
Source: Oxford University Press journal article supplement (doi:10.1158/2159-8290.cd-22-0244), 2023-02-06
Supplement: cd-22-0244_supplementary_tables_suppst1.xlsx [file cd-22-0244_supplementary_tables_suppst1.xlsx]

## Sheet: TableS1
S1: TFCRs of energy metabolism
TFCR	Regulation potential	Regulation P value	Pathway
ZNF750	0.632119	0.00436354	Glycolysis
NFYC	0.612243	0.104517	Glycolysis
KLF11	0.633432	2.55e-05	Glycolysis
ARRB1	0.617018	0.00633712	Glycolysis
ZNF141	0.607962	0.0364154	Glycolysis
DRAP1	0.600366	0.0289558	Glycolysis
E2F3	0.600407	0.0424556	Glycolysis
BARX1	0.594615	0.0680961	Glycolysis
DCP1A	0.604967	0.00329206	Glycolysis
ELK3	0.587608	0.0100144	Glycolysis
NPAT	0.596365	0.127877	Glycolysis
TTF1	0.606846	0.0016513	Glycolysis
HNF4G	0.617091	2.25e-09	Glycolysis
DLX1	0.594354	0.144118	Glycolysis
HNF1A	0.611646	3.49e-09	Glycolysis
HOXA4	0.587826	0.0495075	Glycolysis
MECOM	0.587625	0.248372	Glycolysis
KLF15	0.614424	1.96e-08	Glycolysis
ASH2L	0.600082	0.0170614	Glycolysis
NFYB	0.607048	0.000204582	Glycolysis
ZNF75D	0.715871	0.0013539	Fatty acid metabolism
MBD4	0.694482	0.00188453	Fatty acid metabolism
NFIL3	0.671264	1.91e-07	Fatty acid metabolism
HNF4G	0.692095	2.92e-27	Fatty acid metabolism
NR2F6	0.685135	5.27e-07	Fatty acid metabolism
L3MBTL4	0.638809	0.00680651	Fatty acid metabolism
PPARG	0.672436	4.57e-72	Fatty acid metabolism
TGIF2	0.646299	0.00141121	Fatty acid metabolism
NR2F2	0.660129	1.83e-15	Fatty acid metabolism
ING2	0.613879	0.000253914	Fatty acid metabolism
HEY1	0.634663	0.00913045	Fatty acid metabolism
ARID3A	0.637158	0.00173383	Fatty acid metabolism
KLF11	0.637814	4.43e-07	Fatty acid metabolism
CDK6	0.603913	0.0254935	Fatty acid metabolism
NFIC	0.634258	0.000332566	Fatty acid metabolism
HHEX	0.616796	0.0265329	Fatty acid metabolism
NR1H3	0.63222	9.63e-05	Fatty acid metabolism
CEBPD	0.624601	0.000301584	Fatty acid metabolism
ESRRA	0.617046	0.00228305	Fatty acid metabolism
RUVBL1	0.599444	0.112323	Fatty acid metabolism
DLX1	0.650272	7.6e-17	OXPHOS
NPAT	0.638751	2.82e-13	OXPHOS
KDM5A	0.653678	6.46e-80	OXPHOS
NFYC	0.633117	9.44e-15	OXPHOS
HMGN1	0.62889	1.01e-11	OXPHOS
SMAD5	0.638154	8.22e-21	OXPHOS
ESRRA	0.638817	2.18e-37	OXPHOS
THAP1	0.622258	4.08e-13	OXPHOS
WRNIP1	0.618569	1.81e-12	OXPHOS
TAF7	0.630111	2.61e-39	OXPHOS
RUVBL1	0.610863	5.89e-12	OXPHOS
KLF10	0.620616	9.28e-16	OXPHOS
E2F8	0.607846	2.52e-10	OXPHOS
GTF2F1	0.622638	1.02e-21	OXPHOS
HOXA6	0.606549	1.75e-09	OXPHOS
CDK7	0.627477	9.92e-48	OXPHOS
ING2	0.601068	1.05e-08	OXPHOS
HCFC1	0.624048	1.43e-57	OXPHOS
TAF3	0.602799	2.52e-09	OXPHOS
KMT2D	0.621656	6.28e-70	OXPHOS
NPAT	0.725935	2.95e-05	TCA
ESRRA	0.717027	8.5e-18	TCA
ING2	0.69101	1.36e-05	TCA
HOXA6	0.702806	0.00015807	TCA
E2F3	0.700106	0.000219368	TCA
MYF5	0.671689	0.00036541	TCA
INTS3	0.677138	4.82e-05	TCA
TGIF2	0.686774	5.03e-08	TCA
HOXA4	0.683347	0.00852583	TCA
KDM5A	0.690425	4.98e-15	TCA
WRNIP1	0.658744	2.49e-05	TCA
CBX1	0.697688	7.07e-10	TCA
BPTF	0.681089	0.00178772	TCA
NFYC	0.659471	7.55e-05	TCA
NFIC	0.690659	6.22e-11	TCA
TBL1X	0.666792	0.00988734	TCA
SMAD5	0.669952	1.34e-07	TCA
SIN3A	0.699113	4.16e-29	TCA
SP3	0.677082	0.000179686	TCA
E2F8	0.656371	0.0115523	TCA

## Sheet: TableS2
S2: Bipotent TFCRs
TFCR	Regulation affinity	Regulation module P value	Immune module P value (adjusted)	Immune module estimate	Immune module P value	type
AFF4	0.564298	9.43103e-52	2.24837e-271	0.150122	1.30169e-271	Suppressive
ARID2	0.610451	3.29209e-17	0	0.155711	0	Suppressive
ARID3A	0.604142	3.28965e-09	1.45687e-70	0.107821	1.22684e-70	Suppressive
BRD2	0.585812	8.51099e-89	0	0.148171	0	Suppressive
CDK7	0.618013	5.57208e-56	0	0.206001	0	Suppressive
CDK8	0.597758	1.26852e-82	0	0.152333	0	Suppressive
CEBPA	0.58233	7.02065e-35	3.94475e-36	-0.0986953	3.52951e-36	Stimulatory
CEBPB	0.581958	1.51607e-86	0.000323352	-0.0222642	0.000323352	Stimulatory
CREB1	0.594507	4.51717e-143	0	0.194701	0	Suppressive
E2F1	0.58616	1.59397e-154	1.40577e-144	0.193626	9.98834e-145	Suppressive
E2F6	0.600324	2.02981e-25	0	0.180359	0	Suppressive
ELF1	0.586785	1.64998e-57	3.19335e-42	0.0627869	2.77317e-42	Suppressive
ESRRA	0.640731	4.90105e-54	0	0.230944	0	Suppressive
FLI1	0.559775	8.42672e-15	0	-0.470427	0	Stimulatory
GMEB2	0.593818	3.34593e-19	0	0.180352	0	Suppressive
GTF2B	0.583955	4.35073e-60	2.95141914202406e-314	0.141757	1.47570957101203e-314	Suppressive
GTF2F1	0.584271	2.71197e-23	0	0.189321	0	Suppressive
HEY1	0.615153	3.09079e-15	5.19823e-109	0.164269	4.10387e-109	Suppressive
HOXA6	0.599236	2.16882e-11	0.000245	-0.0767947	0.000238552	Stimulatory
ING2	0.618823	7.11383e-14	0	0.17171	0	Suppressive
KDM5B	0.59122	3.52354e-47	0	0.19898	0	Suppressive
KLF15	0.607522	5.08651e-36	3.18304e-142	0.258704	2.3454e-142	Suppressive
MAZ	0.597154	4.69625e-27	0	0.216526	0	Suppressive
MXI1	0.619514	1.3525e-45	0	0.214979	0	Suppressive
NFATC1	0.600791	4.56514e-20	7.45768e-303	-0.228358	3.9251e-303	Stimulatory
NFIC	0.622024	2.66952e-25	1.56839e-181	0.138623	1.07311e-181	Suppressive
NFYC	0.601171	5.80463e-16	0	0.163888	0	Suppressive
NR1H2	0.595353	3.57018e-13	7.31635e-265	0.150314	4.42832e-265	Suppressive
NR1H3	0.598988	3.05525e-13	1.67943e-127	-0.124892	1.28167e-127	Stimulatory
NR2F2	0.619225	3.02869e-52	3.03822e-21	0.053291	2.79836e-21	Suppressive
NR4A1	0.588373	8.90034e-13	5.79417e-16	0.0769924	5.48921e-16	Suppressive
PML	0.598278	4.21028e-33	6.58609e-229	-0.146606	4.33295e-229	Stimulatory
RBBP5	0.587772	7.60149e-38	0	0.15644	0	Suppressive
RELA	0.559335	2.22748e-111	2.33981e-302	0.137447	1.29305e-302	Suppressive
SIN3A	0.623324	3.83771e-107	0	0.137785	0	Suppressive
TAF3	0.601391	5.4479e-09	0	0.162901	0	Suppressive
THAP1	0.585725	3.3434e-13	2.78017e-262	0.123064	1.7559e-262	Suppressive
VDR	0.55998	1.5926e-27	1.59704e-84	-0.14558	1.30285e-84	Stimulatory

## Sheet: TableS3
S3: Log fold change of T-cell mediated killing upon knockout of OXPHOS genes
Genesymbol	LFC	type	experiment
COX10	0.01549	Coculture-T	Mel624_EffectT_s1
NDUFB7	-5.5626e-05	Coculture-T	Mel624_EffectT_s1
COX7B	-0.24751	Coculture-T	Mel624_EffectT_s1
COX4I2	-0.2214	Coculture-T	Mel624_EffectT_s1
ATP6V0A4	-0.19138	Coculture-T	Mel624_EffectT_s1
UQCRHL	-0.10975	Coculture-T	Mel624_EffectT_s1
NDUFV2	-0.38011	Coculture-T	Mel624_EffectT_s1
TCIRG1	0.10109	Coculture-T	Mel624_EffectT_s1
NDUFA12	-0.10125	Coculture-T	Mel624_EffectT_s1
NDUFA7	-0.15586	Coculture-T	Mel624_EffectT_s1
COX7A2	-0.31604	Coculture-T	Mel624_EffectT_s1
COX5B	-0.013505	Coculture-T	Mel624_EffectT_s1
NDUFC2-KCTD14	0.20754	Coculture-T	Mel624_EffectT_s1
LHPP	-0.0053704	Coculture-T	Mel624_EffectT_s1
ATP6V1G2	0.070045	Coculture-T	Mel624_EffectT_s1
ATP6V0A1	0.052524	Coculture-T	Mel624_EffectT_s1
ATP6V1E2	-0.067281	Coculture-T	Mel624_EffectT_s1
ATP6V1D	-0.14527	Coculture-T	Mel624_EffectT_s1
NDUFA8	-0.074742	Coculture-T	Mel624_EffectT_s1
UQCRH	-0.2006	Coculture-T	Mel624_EffectT_s1
ATP4A	0.034551	Coculture-T	Mel624_EffectT_s1
NDUFS1	0.057826	Coculture-T	Mel624_EffectT_s1
ATP12A	-0.18091	Coculture-T	Mel624_EffectT_s1
NDUFA11	0.023311	Coculture-T	Mel624_EffectT_s1
UQCR10	0.18332	Coculture-T	Mel624_EffectT_s1
ATP6V1C2	0.0052486	Coculture-T	Mel624_EffectT_s1
COX8C	-0.13234	Coculture-T	Mel624_EffectT_s1
NDUFC1	-0.10267	Coculture-T	Mel624_EffectT_s1
ATP4B	-0.046172	Coculture-T	Mel624_EffectT_s1
NDUFA9	-0.071635	Coculture-T	Mel624_EffectT_s1
SDHB	0.027515	Coculture-T	Mel624_EffectT_s1
NDUFS6	0.028831	Coculture-T	Mel624_EffectT_s1
NDUFA6	0.0949	Coculture-T	Mel624_EffectT_s1
COX6A1	-0.011644	Coculture-T	Mel624_EffectT_s1
ATP6V1H	-0.04953	Coculture-T	Mel624_EffectT_s1
NDUFA1	-0.10206	Coculture-T	Mel624_EffectT_s1
PPA2	0.17728	Coculture-T	Mel624_EffectT_s1
ATP6V0D1	-0.12946	Coculture-T	Mel624_EffectT_s1
ATP6V1F	-0.019772	Coculture-T	Mel624_EffectT_s1
ATP6V1A	-0.11276	Coculture-T	Mel624_EffectT_s1
PPA1	-0.017502	Coculture-T	Mel624_EffectT_s1
UQCR11	-0.045324	Coculture-T	Mel624_EffectT_s1
UQCRC1	0.022094	Coculture-T	Mel624_EffectT_s1
NDUFA10	0.0087709	Coculture-T	Mel624_EffectT_s1
COX7B2	0.10105	Coculture-T	Mel624_EffectT_s1
ATP6V0A2	-0.088216	Coculture-T	Mel624_EffectT_s1
NDUFS7	0.099922	Coculture-T	Mel624_EffectT_s1
COX6B2	0.11393	Coculture-T	Mel624_EffectT_s1
NDUFC2	-0.20231	Coculture-T	Mel624_EffectT_s1
ATP6AP1	0.0088996	Coculture-T	Mel624_EffectT_s1
NDUFS2	0.16251	Coculture-T	Mel624_EffectT_s1
COX7A1	-0.007714	Coculture-T	Mel624_EffectT_s1
COX6C	-0.02946	Coculture-T	Mel624_EffectT_s1
NDUFS8	0.048444	Coculture-T	Mel624_EffectT_s1
NDUFA3	-0.029012	Coculture-T	Mel624_EffectT_s1
NDUFB3	-0.070824	Coculture-T	Mel624_EffectT_s1
COX17	0.17578	Coculture-T	Mel624_EffectT_s1
ATP6V0D2	0.10873	Coculture-T	Mel624_EffectT_s1
UQCRB	0.065201	Coculture-T	Mel624_EffectT_s1
ATP6V0E2	-0.086491	Coculture-T	Mel624_EffectT_s1
COX11	0.036885	Coculture-T	Mel624_EffectT_s1
NDUFA4	0.1172	Coculture-T	Mel624_EffectT_s1
SDHD	0.32458	Coculture-T	Mel624_EffectT_s1
COX7A2L	-0.035469	Coculture-T	Mel624_EffectT_s1
NDUFB8	-0.023661	Coculture-T	Mel624_EffectT_s1
COX15	0.37281	Coculture-T	Mel624_EffectT_s1
NDUFS5	0.067763	Coculture-T	Mel624_EffectT_s1
NDUFS4	-0.10516	Coculture-T	Mel624_EffectT_s1
ATP6V1B1	0.02949	Coculture-T	Mel624_EffectT_s1
ATP6V0B	-0.042054	Coculture-T	Mel624_EffectT_s1
CYC1	0.17965	Coculture-T	Mel624_EffectT_s1
NDUFB4	0.051529	Coculture-T	Mel624_EffectT_s1
NDUFA4L2	0.11838	Coculture-T	Mel624_EffectT_s1
ATP6V1E1	0.063131	Coculture-T	Mel624_EffectT_s1
UQCRC2	0.064839	Coculture-T	Mel624_EffectT_s1
ATP6V0E1	0.14192	Coculture-T	Mel624_EffectT_s1
COX5A	0.047552	Coculture-T	Mel624_EffectT_s1
COX6B1	0.15352	Coculture-T	Mel624_EffectT_s1
NDUFA2	0.02295	Coculture-T	Mel624_EffectT_s1
UQCRQ	-0.010155	Coculture-T	Mel624_EffectT_s1
SDHC	0.042235	Coculture-T	Mel624_EffectT_s1
COX4I1	-0.0077906	Coculture-T	Mel624_EffectT_s1
ATP6V1G1	0.019995	Coculture-T	Mel624_EffectT_s1
NDUFAB1	0.072108	Coculture-T	Mel624_EffectT_s1
ATP6V1G3	0.053164	Coculture-T	Mel624_EffectT_s1
NDUFV3	-0.071252	Coculture-T	Mel624_EffectT_s1
NDUFB2	0.061859	Coculture-T	Mel624_EffectT_s1
COX6A2	0.14593	Coculture-T	Mel624_EffectT_s1
COX7C	-0.0063303	Coculture-T	Mel624_EffectT_s1
ATP6V1C1	0.16769	Coculture-T	Mel624_EffectT_s1
NDUFV1	0.12721	Coculture-T	Mel624_EffectT_s1
NDUFB9	0.06915	Coculture-T	Mel624_EffectT_s1
NDUFB6	0.13227	Coculture-T	Mel624_EffectT_s1
NDUFA13	0.31205	Coculture-T	Mel624_EffectT_s1
UQCRFS1	0.24428	Coculture-T	Mel624_EffectT_s1
SDHA	0.19402	Coculture-T	Mel624_EffectT_s1
NDUFS3	0.11082	Coculture-T	Mel624_EffectT_s1
NDUFB1	0.084025	Coculture-T	Mel624_EffectT_s1
NDUFB11	0.10328	Coculture-T	Mel624_EffectT_s1
NDUFB5	0.18658	Coculture-T	Mel624_EffectT_s1
NDUFA5	0.13649	Coculture-T	Mel624_EffectT_s1
ATP6V1B2	0.13505	Coculture-T	Mel624_EffectT_s1
COX8A	0.10897	Coculture-T	Mel624_EffectT_s1
NDUFB10	0.18852	Coculture-T	Mel624_EffectT_s1
ATP6V0C	0.55546	Coculture-T	Mel624_EffectT_s1
ATP6V1H	-0.31782	Coculture-T	Mel624_EffectT_s2
NDUFA11	-0.30022	Coculture-T	Mel624_EffectT_s2
CYC1	-0.28345	Coculture-T	Mel624_EffectT_s2
NDUFC2-KCTD14	-0.34856	Coculture-T	Mel624_EffectT_s2
ATP4A	-0.2235	Coculture-T	Mel624_EffectT_s2
COX7A1	0.087497	Coculture-T	Mel624_EffectT_s2
NDUFA7	-0.26975	Coculture-T	Mel624_EffectT_s2
ATP6V0B	-0.40226	Coculture-T	Mel624_EffectT_s2
ATP6V1E2	-0.1325	Coculture-T	Mel624_EffectT_s2
NDUFB10	-0.2012	Coculture-T	Mel624_EffectT_s2
ATP6V0E1	-0.13416	Coculture-T	Mel624_EffectT_s2
ATP6V0D1	-0.000643	Coculture-T	Mel624_EffectT_s2
NDUFA8	-0.084309	Coculture-T	Mel624_EffectT_s2
ATP6V0A1	0.18756	Coculture-T	Mel624_EffectT_s2
ATP6V0C	-0.75369	Coculture-T	Mel624_EffectT_s2
COX7A2L	-0.20922	Coculture-T	Mel624_EffectT_s2
NDUFB9	-0.14569	Coculture-T	Mel624_EffectT_s2
COX7C	-0.21193	Coculture-T	Mel624_EffectT_s2
ATP6V0D2	-0.20246	Coculture-T	Mel624_EffectT_s2
COX10	0.19328	Coculture-T	Mel624_EffectT_s2
ATP6V1B2	-0.10671	Coculture-T	Mel624_EffectT_s2
PPA2	0.05071	Coculture-T	Mel624_EffectT_s2
COX7B	-0.12385	Coculture-T	Mel624_EffectT_s2
NDUFS8	-0.099338	Coculture-T	Mel624_EffectT_s2
ATP6V1F	0.32084	Coculture-T	Mel624_EffectT_s2
NDUFB6	0.24921	Coculture-T	Mel624_EffectT_s2
COX4I1	0.1692	Coculture-T	Mel624_EffectT_s2
NDUFA4	-0.034812	Coculture-T	Mel624_EffectT_s2
COX7A2	-0.27094	Coculture-T	Mel624_EffectT_s2
COX8C	-0.10718	Coculture-T	Mel624_EffectT_s2
UQCRFS1	-0.09408	Coculture-T	Mel624_EffectT_s2
NDUFV3	0.30095	Coculture-T	Mel624_EffectT_s2
LHPP	0.101	Coculture-T	Mel624_EffectT_s2
NDUFB3	-0.1483	Coculture-T	Mel624_EffectT_s2
COX7B2	0.0029066	Coculture-T	Mel624_EffectT_s2
NDUFA6	-0.087817	Coculture-T	Mel624_EffectT_s2
COX5A	0.044638	Coculture-T	Mel624_EffectT_s2
ATP6AP1	-0.11363	Coculture-T	Mel624_EffectT_s2
ATP6V1C1	-0.15427	Coculture-T	Mel624_EffectT_s2
TCIRG1	-0.020077	Coculture-T	Mel624_EffectT_s2
COX8A	0.046583	Coculture-T	Mel624_EffectT_s2
NDUFA2	0.13505	Coculture-T	Mel624_EffectT_s2
SDHA	-0.00042711	Coculture-T	Mel624_EffectT_s2
NDUFS4	-0.12763	Coculture-T	Mel624_EffectT_s2
ATP6V1G3	0.029142	Coculture-T	Mel624_EffectT_s2
PPA1	-0.034194	Coculture-T	Mel624_EffectT_s2
SDHD	0.10743	Coculture-T	Mel624_EffectT_s2
UQCRHL	-0.063014	Coculture-T	Mel624_EffectT_s2
ATP4B	-0.1591	Coculture-T	Mel624_EffectT_s2
NDUFB2	0.053795	Coculture-T	Mel624_EffectT_s2
NDUFB7	0.032781	Coculture-T	Mel624_EffectT_s2
NDUFA3	-0.032691	Coculture-T	Mel624_EffectT_s2
NDUFA5	0.068049	Coculture-T	Mel624_EffectT_s2
NDUFS3	0.01092	Coculture-T	Mel624_EffectT_s2
ATP12A	-0.074608	Coculture-T	Mel624_EffectT_s2
ATP6V1D	-0.019117	Coculture-T	Mel624_EffectT_s2
ATP6V1C2	0.045505	Coculture-T	Mel624_EffectT_s2
NDUFB4	-0.085134	Coculture-T	Mel624_EffectT_s2
NDUFS1	-0.081124	Coculture-T	Mel624_EffectT_s2
UQCRB	0.027953	Coculture-T	Mel624_EffectT_s2
NDUFA1	0.057195	Coculture-T	Mel624_EffectT_s2
ATP6V1E1	-0.03397	Coculture-T	Mel624_EffectT_s2
UQCRQ	0.04363	Coculture-T	Mel624_EffectT_s2
NDUFV2	0.055572	Coculture-T	Mel624_EffectT_s2
NDUFB11	0.11649	Coculture-T	Mel624_EffectT_s2
ATP6V1A	0.0056727	Coculture-T	Mel624_EffectT_s2
COX6B1	-0.057975	Coculture-T	Mel624_EffectT_s2
UQCR10	-0.047598	Coculture-T	Mel624_EffectT_s2
ATP6V1G2	0.067833	Coculture-T	Mel624_EffectT_s2
NDUFC1	-0.031531	Coculture-T	Mel624_EffectT_s2
ATP6V0E2	0.051783	Coculture-T	Mel624_EffectT_s2
ATP6V1G1	-0.085972	Coculture-T	Mel624_EffectT_s2
COX6C	-0.0073302	Coculture-T	Mel624_EffectT_s2
NDUFA4L2	0.22042	Coculture-T	Mel624_EffectT_s2
ATP6V0A2	0.12748	Coculture-T	Mel624_EffectT_s2
COX4I2	0.0038935	Coculture-T	Mel624_EffectT_s2
ATP6V0A4	0.041326	Coculture-T	Mel624_EffectT_s2
SDHB	0.026573	Coculture-T	Mel624_EffectT_s2
NDUFS7	-0.023773	Coculture-T	Mel624_EffectT_s2
NDUFA13	0.31534	Coculture-T	Mel624_EffectT_s2
UQCRH	0.10126	Coculture-T	Mel624_EffectT_s2
NDUFC2	0.30383	Coculture-T	Mel624_EffectT_s2
SDHC	0.075056	Coculture-T	Mel624_EffectT_s2
COX17	0.1026	Coculture-T	Mel624_EffectT_s2
NDUFB1	0.22808	Coculture-T	Mel624_EffectT_s2
NDUFAB1	0.17128	Coculture-T	Mel624_EffectT_s2
NDUFB8	0.26873	Coculture-T	Mel624_EffectT_s2
NDUFB5	0.021104	Coculture-T	Mel624_EffectT_s2
COX11	0.25555	Coculture-T	Mel624_EffectT_s2
NDUFA10	0.29476	Coculture-T	Mel624_EffectT_s2
NDUFA9	0.14343	Coculture-T	Mel624_EffectT_s2
UQCRC2	0.033693	Coculture-T	Mel624_EffectT_s2
COX6A2	0.14365	Coculture-T	Mel624_EffectT_s2
COX15	0.092744	Coculture-T	Mel624_EffectT_s2
COX6A1	0.16989	Coculture-T	Mel624_EffectT_s2
NDUFA12	0.27209	Coculture-T	Mel624_EffectT_s2
UQCR11	0.144	Coculture-T	Mel624_EffectT_s2
NDUFS5	-0.01751	Coculture-T	Mel624_EffectT_s2
NDUFS6	0.064465	Coculture-T	Mel624_EffectT_s2
NDUFV1	0.2304	Coculture-T	Mel624_EffectT_s2
UQCRC1	0.058558	Coculture-T	Mel624_EffectT_s2
COX6B2	0.2037	Coculture-T	Mel624_EffectT_s2
ATP6V1B1	0.18746	Coculture-T	Mel624_EffectT_s2
COX5B	0.26072	Coculture-T	Mel624_EffectT_s2
NDUFS2	0.15288	Coculture-T	Mel624_EffectT_s2
COX7A2L	-6.8998	Coculture-T	B16F10_koPRF1.OT-I
NDUFS7	0.3394	Coculture-T	B16F10_koPRF1.OT-I
ATP6V1F	-4.888	Coculture-T	B16F10_koPRF1.OT-I
SDHA	-3.2074	Coculture-T	B16F10_koPRF1.OT-I
NDUFA11	-4.7473	Coculture-T	B16F10_koPRF1.OT-I
SDHD	0.83558	Coculture-T	B16F10_koPRF1.OT-I
COX5A	-5.1221	Coculture-T	B16F10_koPRF1.OT-I
COX6A1	-2.8175	Coculture-T	B16F10_koPRF1.OT-I
NDUFB8	-4.4341	Coculture-T	B16F10_koPRF1.OT-I
UQCRQ	-3.9402	Coculture-T	B16F10_koPRF1.OT-I
NDUFS8	-4.7656	Coculture-T	B16F10_koPRF1.OT-I
COX4I1	-3.1093	Coculture-T	B16F10_koPRF1.OT-I
COX7A2	-1.293	Coculture-T	B16F10_koPRF1.OT-I
ATP6V1C2	-2.6026	Coculture-T	B16F10_koPRF1.OT-I
NDUFS4	1.5826	Coculture-T	B16F10_koPRF1.OT-I
ATP4B	-3.599	Coculture-T	B16F10_koPRF1.OT-I
NDUFA12	2.3735	Coculture-T	B16F10_koPRF1.OT-I
ATP6V1E2	0.71657	Coculture-T	B16F10_koPRF1.OT-I
COX10	2.1207	Coculture-T	B16F10_koPRF1.OT-I
ATP6AP1	-3.6732	Coculture-T	B16F10_koPRF1.OT-I
NDUFB6	-3.9432	Coculture-T	B16F10_koPRF1.OT-I
PPA1	-3.1134	Coculture-T	B16F10_koPRF1.OT-I
COX7C	-2.7301	Coculture-T	B16F10_koPRF1.OT-I
NDUFS6	-3.8831	Coculture-T	B16F10_koPRF1.OT-I
CYC1	-0.54901	Coculture-T	B16F10_koPRF1.OT-I
NDUFS1	-4.1131	Coculture-T	B16F10_koPRF1.OT-I
COX6A2	-3.0549	Coculture-T	B16F10_koPRF1.OT-I
NDUFA3	-2.0875	Coculture-T	B16F10_koPRF1.OT-I
COX5B	-3.9713	Coculture-T	B16F10_koPRF1.OT-I
COX6B1	-1.4583	Coculture-T	B16F10_koPRF1.OT-I
ATP6V1D	-1.7492	Coculture-T	B16F10_koPRF1.OT-I
NDUFB10	1.832	Coculture-T	B16F10_koPRF1.OT-I
NDUFB5	2.1375	Coculture-T	B16F10_koPRF1.OT-I
PPA2	0.071724	Coculture-T	B16F10_koPRF1.OT-I
ATP6V1G3	-0.78427	Coculture-T	B16F10_koPRF1.OT-I
NDUFA10	-1.6222	Coculture-T	B16F10_koPRF1.OT-I
UQCRH	-1.0473	Coculture-T	B16F10_koPRF1.OT-I
NDUFAB1	-1.0381	Coculture-T	B16F10_koPRF1.OT-I
NDUFB9	2.2579	Coculture-T	B16F10_koPRF1.OT-I
COX7B	-0.52482	Coculture-T	B16F10_koPRF1.OT-I
COX17	-1.5419	Coculture-T	B16F10_koPRF1.OT-I
NDUFA4	-2.3343	Coculture-T	B16F10_koPRF1.OT-I
ATP6V1A	-1.7211	Coculture-T	B16F10_koPRF1.OT-I
NDUFA8	-1.146	Coculture-T	B16F10_koPRF1.OT-I
NDUFA4L2	-3.0273	Coculture-T	B16F10_koPRF1.OT-I
COX11	-2.0384	Coculture-T	B16F10_koPRF1.OT-I
ATP6V1B1	-0.52284	Coculture-T	B16F10_koPRF1.OT-I
NDUFB11	-1.4497	Coculture-T	B16F10_koPRF1.OT-I
COX15	-1.4411	Coculture-T	B16F10_koPRF1.OT-I
ATP6V1C1	-1.4149	Coculture-T	B16F10_koPRF1.OT-I
ATP6V0A1	-1.2799	Coculture-T	B16F10_koPRF1.OT-I
COX7A1	0.48143	Coculture-T	B16F10_koPRF1.OT-I
ATP6V1G2	-0.41163	Coculture-T	B16F10_koPRF1.OT-I
COX6C	4.6115	Coculture-T	B16F10_koPRF1.OT-I
ATP6V0A4	-0.14046	Coculture-T	B16F10_koPRF1.OT-I
COX4I2	-0.76963	Coculture-T	B16F10_koPRF1.OT-I
NDUFS3	1.9123	Coculture-T	B16F10_koPRF1.OT-I
NDUFA9	-0.74362	Coculture-T	B16F10_koPRF1.OT-I
ATP6V0D2	-0.3277	Coculture-T	B16F10_koPRF1.OT-I
NDUFA13	1.8317	Coculture-T	B16F10_koPRF1.OT-I
NDUFB3	-0.062571	Coculture-T	B16F10_koPRF1.OT-I
NDUFC2	0.25619	Coculture-T	B16F10_koPRF1.OT-I
NDUFA5	-0.43548	Coculture-T	B16F10_koPRF1.OT-I
ATP6V0D1	-0.51005	Coculture-T	B16F10_koPRF1.OT-I
NDUFB4	1.3334	Coculture-T	B16F10_koPRF1.OT-I
NDUFS2	0.43186	Coculture-T	B16F10_koPRF1.OT-I
ATP6V1G1	2.5639	Coculture-T	B16F10_koPRF1.OT-I
ATP6V0B	-0.40932	Coculture-T	B16F10_koPRF1.OT-I
NDUFB7	-0.16138	Coculture-T	B16F10_koPRF1.OT-I
COX7B2	1.0957	Coculture-T	B16F10_koPRF1.OT-I
NDUFS5	1.2089	Coculture-T	B16F10_koPRF1.OT-I
NDUFV3	1.4768	Coculture-T	B16F10_koPRF1.OT-I
UQCRHL	0.4085	Coculture-T	B16F10_koPRF1.OT-I
NDUFB1	-0.38148	Coculture-T	B16F10_koPRF1.OT-I
UQCRC2	0.11882	Coculture-T	B16F10_koPRF1.OT-I
ATP6V0C	1.5759	Coculture-T	B16F10_koPRF1.OT-I
ATP6V1H	-1.12	Coculture-T	B16F10_koPRF1.OT-I
COX8A	0.085281	Coculture-T	B16F10_koPRF1.OT-I
COX8C	1.8346	Coculture-T	B16F10_koPRF1.OT-I
UQCR11	0.09118	Coculture-T	B16F10_koPRF1.OT-I
NDUFC1	1.9756	Coculture-T	B16F10_koPRF1.OT-I
UQCRB	-0.073314	Coculture-T	B16F10_koPRF1.OT-I
ATP4A	1.922	Coculture-T	B16F10_koPRF1.OT-I
SDHB	0.85877	Coculture-T	B16F10_koPRF1.OT-I
ATP12A	0.50133	Coculture-T	B16F10_koPRF1.OT-I
NDUFC2-KCTD14	2.2139	Coculture-T	B16F10_koPRF1.OT-I
UQCRC1	0.076462	Coculture-T	B16F10_koPRF1.OT-I
ATP6V0E1	1.8339	Coculture-T	B16F10_koPRF1.OT-I
UQCRFS1	1.8835	Coculture-T	B16F10_koPRF1.OT-I
SDHC	-0.94331	Coculture-T	B16F10_koPRF1.OT-I
NDUFA2	0.46658	Coculture-T	B16F10_koPRF1.OT-I
NDUFB2	1.4554	Coculture-T	B16F10_koPRF1.OT-I
NDUFV1	2.5292	Coculture-T	B16F10_koPRF1.OT-I
NDUFA7	-0.1046	Coculture-T	B16F10_koPRF1.OT-I
NDUFA6	1.6105	Coculture-T	B16F10_koPRF1.OT-I
NDUFV2	0.26502	Coculture-T	B16F10_koPRF1.OT-I
TCIRG1	2.6888	Coculture-T	B16F10_koPRF1.OT-I
ATP6V1B2	1.1957	Coculture-T	B16F10_koPRF1.OT-I
ATP6V1E1	1.2867	Coculture-T	B16F10_koPRF1.OT-I
UQCR10	2.0823	Coculture-T	B16F10_koPRF1.OT-I
COX6B2	1.3202	Coculture-T	B16F10_koPRF1.OT-I
ATP6V0E2	2.2114	Coculture-T	B16F10_koPRF1.OT-I
LHPP	2.3837	Coculture-T	B16F10_koPRF1.OT-I
NDUFA1	2.4445	Coculture-T	B16F10_koPRF1.OT-I
ATP6V0A2	1.7955	Coculture-T	B16F10_koPRF1.OT-I
SDHB	-1.3048	Coculture-T	IFNGR1mut.SKCM_MART-1_r1
NDUFA13	-0.297	Coculture-T	IFNGR1mut.SKCM_MART-1_r1
ATP12A	-0.38701	Coculture-T	IFNGR1mut.SKCM_MART-1_r1
NDUFS4	-0.38138	Coculture-T	IFNGR1mut.SKCM_MART-1_r1
COX4I1	-0.25014	Coculture-T	IFNGR1mut.SKCM_MART-1_r1
ATP6V0A1	-0.11055	Coculture-T	IFNGR1mut.SKCM_MART-1_r1
NDUFA12	-0.3051	Coculture-T	IFNGR1mut.SKCM_MART-1_r1
ATP6V0A4	-0.33561	Coculture-T	IFNGR1mut.SKCM_MART-1_r1
NDUFV1	-0.34225	Coculture-T	IFNGR1mut.SKCM_MART-1_r1
NDUFB9	-0.52065	Coculture-T	IFNGR1mut.SKCM_MART-1_r1
NDUFA5	-0.37748	Coculture-T	IFNGR1mut.SKCM_MART-1_r1
NDUFV3	-0.053807	Coculture-T	IFNGR1mut.SKCM_MART-1_r1
COX6B1	-0.0073617	Coculture-T	IFNGR1mut.SKCM_MART-1_r1
NDUFC2-KCTD14	-0.47207	Coculture-T	IFNGR1mut.SKCM_MART-1_r1
PPA2	-0.26736	Coculture-T	IFNGR1mut.SKCM_MART-1_r1
SDHC	-0.22591	Coculture-T	IFNGR1mut.SKCM_MART-1_r1
NDUFB2	-0.10869	Coculture-T	IFNGR1mut.SKCM_MART-1_r1
ATP6V1D	-0.17185	Coculture-T	IFNGR1mut.SKCM_MART-1_r1
NDUFS2	-0.56376	Coculture-T	IFNGR1mut.SKCM_MART-1_r1
COX7A2L	-0.26426	Coculture-T	IFNGR1mut.SKCM_MART-1_r1
TCIRG1	0.1912	Coculture-T	IFNGR1mut.SKCM_MART-1_r1
UQCRC2	-0.46446	Coculture-T	IFNGR1mut.SKCM_MART-1_r1
NDUFC2	-0.050299	Coculture-T	IFNGR1mut.SKCM_MART-1_r1
COX7B	-0.31108	Coculture-T	IFNGR1mut.SKCM_MART-1_r1
ATP6V1C2	0.032	Coculture-T	IFNGR1mut.SKCM_MART-1_r1
UQCRFS1	0.24432	Coculture-T	IFNGR1mut.SKCM_MART-1_r1
COX6A1	-0.14723	Coculture-T	IFNGR1mut.SKCM_MART-1_r1
ATP6V0E1	-0.28091	Coculture-T	IFNGR1mut.SKCM_MART-1_r1
UQCRQ	-0.22805	Coculture-T	IFNGR1mut.SKCM_MART-1_r1
NDUFS5	-0.39462	Coculture-T	IFNGR1mut.SKCM_MART-1_r1
ATP6V0D2	-0.17874	Coculture-T	IFNGR1mut.SKCM_MART-1_r1
COX6C	0.1105	Coculture-T	IFNGR1mut.SKCM_MART-1_r1
NDUFA2	-0.31647	Coculture-T	IFNGR1mut.SKCM_MART-1_r1
NDUFB7	-0.12387	Coculture-T	IFNGR1mut.SKCM_MART-1_r1
COX6A2	-0.171	Coculture-T	IFNGR1mut.SKCM_MART-1_r1
ATP6V0B	-0.61788	Coculture-T	IFNGR1mut.SKCM_MART-1_r1
NDUFA10	-0.25429	Coculture-T	IFNGR1mut.SKCM_MART-1_r1
ATP6V1G3	-0.10352	Coculture-T	IFNGR1mut.SKCM_MART-1_r1
COX15	-0.31625	Coculture-T	IFNGR1mut.SKCM_MART-1_r1
ATP6V0E2	0.042822	Coculture-T	IFNGR1mut.SKCM_MART-1_r1
NDUFA11	-0.18464	Coculture-T	IFNGR1mut.SKCM_MART-1_r1
COX7A2	-0.23548	Coculture-T	IFNGR1mut.SKCM_MART-1_r1
ATP6AP1	-0.18646	Coculture-T	IFNGR1mut.SKCM_MART-1_r1
CYC1	-0.07827	Coculture-T	IFNGR1mut.SKCM_MART-1_r1
NDUFS1	-0.23968	Coculture-T	IFNGR1mut.SKCM_MART-1_r1
UQCR11	-0.13491	Coculture-T	IFNGR1mut.SKCM_MART-1_r1
NDUFA1	-0.13479	Coculture-T	IFNGR1mut.SKCM_MART-1_r1
COX6B2	-0.06775	Coculture-T	IFNGR1mut.SKCM_MART-1_r1
ATP6V0C	-0.68534	Coculture-T	IFNGR1mut.SKCM_MART-1_r1
ATP4A	0.071174	Coculture-T	IFNGR1mut.SKCM_MART-1_r1
ATP6V1C1	0.077579	Coculture-T	IFNGR1mut.SKCM_MART-1_r1
NDUFB5	-0.16796	Coculture-T	IFNGR1mut.SKCM_MART-1_r1
COX11	0.2904	Coculture-T	IFNGR1mut.SKCM_MART-1_r1
UQCRHL	0.079839	Coculture-T	IFNGR1mut.SKCM_MART-1_r1
COX5B	0.27316	Coculture-T	IFNGR1mut.SKCM_MART-1_r1
NDUFS3	0.16969	Coculture-T	IFNGR1mut.SKCM_MART-1_r1
NDUFS8	-0.4718	Coculture-T	IFNGR1mut.SKCM_MART-1_r1
NDUFA4L2	0.22226	Coculture-T	IFNGR1mut.SKCM_MART-1_r1
NDUFA8	0.2581	Coculture-T	IFNGR1mut.SKCM_MART-1_r1
NDUFB8	0.046289	Coculture-T	IFNGR1mut.SKCM_MART-1_r1
LHPP	0.28941	Coculture-T	IFNGR1mut.SKCM_MART-1_r1
COX17	-0.0099237	Coculture-T	IFNGR1mut.SKCM_MART-1_r1
NDUFS7	0.23285	Coculture-T	IFNGR1mut.SKCM_MART-1_r1
COX7A1	-0.025993	Coculture-T	IFNGR1mut.SKCM_MART-1_r1
NDUFA3	0.3365	Coculture-T	IFNGR1mut.SKCM_MART-1_r1
SDHD	-0.070163	Coculture-T	IFNGR1mut.SKCM_MART-1_r1
UQCRC1	-0.067418	Coculture-T	IFNGR1mut.SKCM_MART-1_r1
ATP6V1A	0.073281	Coculture-T	IFNGR1mut.SKCM_MART-1_r1
ATP6V1H	-0.046888	Coculture-T	IFNGR1mut.SKCM_MART-1_r1
NDUFA4	0.038968	Coculture-T	IFNGR1mut.SKCM_MART-1_r1
ATP6V1F	0.010854	Coculture-T	IFNGR1mut.SKCM_MART-1_r1
UQCRB	-0.019835	Coculture-T	IFNGR1mut.SKCM_MART-1_r1
SDHA	0.098228	Coculture-T	IFNGR1mut.SKCM_MART-1_r1
NDUFV2	-0.051605	Coculture-T	IFNGR1mut.SKCM_MART-1_r1
ATP4B	-0.089495	Coculture-T	IFNGR1mut.SKCM_MART-1_r1
NDUFB1	-0.02291	Coculture-T	IFNGR1mut.SKCM_MART-1_r1
NDUFB11	-0.23475	Coculture-T	IFNGR1mut.SKCM_MART-1_r1
COX7B2	-0.15054	Coculture-T	IFNGR1mut.SKCM_MART-1_r1
COX10	0.29501	Coculture-T	IFNGR1mut.SKCM_MART-1_r1
NDUFC1	0.22181	Coculture-T	IFNGR1mut.SKCM_MART-1_r1
NDUFA9	-0.14195	Coculture-T	IFNGR1mut.SKCM_MART-1_r1
NDUFA6	0.26783	Coculture-T	IFNGR1mut.SKCM_MART-1_r1
ATP6V1G2	0.0039252	Coculture-T	IFNGR1mut.SKCM_MART-1_r1
ATP6V1G1	0.097833	Coculture-T	IFNGR1mut.SKCM_MART-1_r1
ATP6V1E1	-0.061794	Coculture-T	IFNGR1mut.SKCM_MART-1_r1
NDUFA7	0.054424	Coculture-T	IFNGR1mut.SKCM_MART-1_r1
ATP6V1B2	-0.092127	Coculture-T	IFNGR1mut.SKCM_MART-1_r1
COX4I2	-0.042908	Coculture-T	IFNGR1mut.SKCM_MART-1_r1
ATP6V1E2	-0.018247	Coculture-T	IFNGR1mut.SKCM_MART-1_r1
COX7C	0.29513	Coculture-T	IFNGR1mut.SKCM_MART-1_r1
COX8A	0.21744	Coculture-T	IFNGR1mut.SKCM_MART-1_r1
ATP6V0D1	0.32268	Coculture-T	IFNGR1mut.SKCM_MART-1_r1
UQCR10	0.17444	Coculture-T	IFNGR1mut.SKCM_MART-1_r1
ATP6V0A2	0.12192	Coculture-T	IFNGR1mut.SKCM_MART-1_r1
COX5A	0.58204	Coculture-T	IFNGR1mut.SKCM_MART-1_r1
NDUFB4	0.17855	Coculture-T	IFNGR1mut.SKCM_MART-1_r1
ATP6V1B1	0.29007	Coculture-T	IFNGR1mut.SKCM_MART-1_r1
PPA1	0.09394	Coculture-T	IFNGR1mut.SKCM_MART-1_r1
NDUFAB1	0.17437	Coculture-T	IFNGR1mut.SKCM_MART-1_r1
NDUFB3	0.10515	Coculture-T	IFNGR1mut.SKCM_MART-1_r1
NDUFB10	0.32316	Coculture-T	IFNGR1mut.SKCM_MART-1_r1
NDUFB6	0.3215	Coculture-T	IFNGR1mut.SKCM_MART-1_r1
NDUFS6	0.22988	Coculture-T	IFNGR1mut.SKCM_MART-1_r1
COX8C	0.78403	Coculture-T	IFNGR1mut.SKCM_MART-1_r1
UQCRH	0.21129	Coculture-T	IFNGR1mut.SKCM_MART-1_r1
NDUFA11	-0.5762	Coculture-T	IFNGR1mut.SKCM_MART-1_r2
COX17	-2.4631	Coculture-T	IFNGR1mut.SKCM_MART-1_r2
ATP6V1D	-0.57099	Coculture-T	IFNGR1mut.SKCM_MART-1_r2
COX6B1	-0.89571	Coculture-T	IFNGR1mut.SKCM_MART-1_r2
UQCRC1	-0.44988	Coculture-T	IFNGR1mut.SKCM_MART-1_r2
NDUFB8	-0.55483	Coculture-T	IFNGR1mut.SKCM_MART-1_r2
SDHB	-0.58052	Coculture-T	IFNGR1mut.SKCM_MART-1_r2
NDUFA6	-0.55658	Coculture-T	IFNGR1mut.SKCM_MART-1_r2
ATP6V1G1	-1.2612	Coculture-T	IFNGR1mut.SKCM_MART-1_r2
NDUFA9	-0.29768	Coculture-T	IFNGR1mut.SKCM_MART-1_r2
COX7B2	-0.060724	Coculture-T	IFNGR1mut.SKCM_MART-1_r2
NDUFS2	-0.77998	Coculture-T	IFNGR1mut.SKCM_MART-1_r2
NDUFB9	-0.29535	Coculture-T	IFNGR1mut.SKCM_MART-1_r2
ATP6V0A2	-0.24376	Coculture-T	IFNGR1mut.SKCM_MART-1_r2
NDUFB3	-0.067504	Coculture-T	IFNGR1mut.SKCM_MART-1_r2
NDUFV2	-0.15018	Coculture-T	IFNGR1mut.SKCM_MART-1_r2
UQCR10	0.15572	Coculture-T	IFNGR1mut.SKCM_MART-1_r2
NDUFAB1	-0.5492	Coculture-T	IFNGR1mut.SKCM_MART-1_r2
COX7A2L	-0.12447	Coculture-T	IFNGR1mut.SKCM_MART-1_r2
NDUFA4	-0.184	Coculture-T	IFNGR1mut.SKCM_MART-1_r2
COX7C	-0.44243	Coculture-T	IFNGR1mut.SKCM_MART-1_r2
NDUFB1	-0.13804	Coculture-T	IFNGR1mut.SKCM_MART-1_r2
ATP6V0B	-0.72814	Coculture-T	IFNGR1mut.SKCM_MART-1_r2
ATP6V1B2	-0.56755	Coculture-T	IFNGR1mut.SKCM_MART-1_r2
COX4I2	-0.15894	Coculture-T	IFNGR1mut.SKCM_MART-1_r2
NDUFC1	0.27654	Coculture-T	IFNGR1mut.SKCM_MART-1_r2
NDUFA2	-0.32379	Coculture-T	IFNGR1mut.SKCM_MART-1_r2
SDHD	-0.11203	Coculture-T	IFNGR1mut.SKCM_MART-1_r2
NDUFB6	-0.1306	Coculture-T	IFNGR1mut.SKCM_MART-1_r2
ATP6V0A1	-0.12864	Coculture-T	IFNGR1mut.SKCM_MART-1_r2
UQCRC2	-0.16832	Coculture-T	IFNGR1mut.SKCM_MART-1_r2
LHPP	-0.03632	Coculture-T	IFNGR1mut.SKCM_MART-1_r2
SDHA	-0.37965	Coculture-T	IFNGR1mut.SKCM_MART-1_r2
NDUFA3	-0.17315	Coculture-T	IFNGR1mut.SKCM_MART-1_r2
UQCRB	-0.1405	Coculture-T	IFNGR1mut.SKCM_MART-1_r2
ATP6V1A	-0.07528	Coculture-T	IFNGR1mut.SKCM_MART-1_r2
COX8C	-0.07898	Coculture-T	IFNGR1mut.SKCM_MART-1_r2
NDUFA5	0.10541	Coculture-T	IFNGR1mut.SKCM_MART-1_r2
COX5A	0.060712	Coculture-T	IFNGR1mut.SKCM_MART-1_r2
NDUFS8	-0.11885	Coculture-T	IFNGR1mut.SKCM_MART-1_r2
COX7A1	-0.047256	Coculture-T	IFNGR1mut.SKCM_MART-1_r2
NDUFC2-KCTD14	0.33129	Coculture-T	IFNGR1mut.SKCM_MART-1_r2
ATP6V0E2	0.091922	Coculture-T	IFNGR1mut.SKCM_MART-1_r2
UQCRFS1	0.24341	Coculture-T	IFNGR1mut.SKCM_MART-1_r2
NDUFB2	-0.23441	Coculture-T	IFNGR1mut.SKCM_MART-1_r2
ATP6V1F	-0.097368	Coculture-T	IFNGR1mut.SKCM_MART-1_r2
NDUFS4	0.21301	Coculture-T	IFNGR1mut.SKCM_MART-1_r2
ATP12A	0.086629	Coculture-T	IFNGR1mut.SKCM_MART-1_r2
COX5B	-0.084091	Coculture-T	IFNGR1mut.SKCM_MART-1_r2
UQCRH	0.049925	Coculture-T	IFNGR1mut.SKCM_MART-1_r2
NDUFA4L2	-0.12709	Coculture-T	IFNGR1mut.SKCM_MART-1_r2
ATP6V1B1	-0.096124	Coculture-T	IFNGR1mut.SKCM_MART-1_r2
ATP6V1E1	-0.24857	Coculture-T	IFNGR1mut.SKCM_MART-1_r2
ATP6V0D1	-0.14338	Coculture-T	IFNGR1mut.SKCM_MART-1_r2
NDUFV3	-0.1531	Coculture-T	IFNGR1mut.SKCM_MART-1_r2
COX11	0.19734	Coculture-T	IFNGR1mut.SKCM_MART-1_r2
NDUFA13	-0.17955	Coculture-T	IFNGR1mut.SKCM_MART-1_r2
COX6A2	0.049777	Coculture-T	IFNGR1mut.SKCM_MART-1_r2
UQCRQ	-0.15302	Coculture-T	IFNGR1mut.SKCM_MART-1_r2
NDUFB10	-0.1303	Coculture-T	IFNGR1mut.SKCM_MART-1_r2
PPA2	-0.4043	Coculture-T	IFNGR1mut.SKCM_MART-1_r2
NDUFB4	0.14064	Coculture-T	IFNGR1mut.SKCM_MART-1_r2
COX4I1	0.035534	Coculture-T	IFNGR1mut.SKCM_MART-1_r2
NDUFS3	0.19792	Coculture-T	IFNGR1mut.SKCM_MART-1_r2
ATP4A	0.056579	Coculture-T	IFNGR1mut.SKCM_MART-1_r2
ATP6V1C2	-0.059585	Coculture-T	IFNGR1mut.SKCM_MART-1_r2
ATP6V1C1	-0.14461	Coculture-T	IFNGR1mut.SKCM_MART-1_r2
NDUFC2	-0.069747	Coculture-T	IFNGR1mut.SKCM_MART-1_r2
ATP6V1E2	-0.090555	Coculture-T	IFNGR1mut.SKCM_MART-1_r2
ATP6V1G3	0.0012789	Coculture-T	IFNGR1mut.SKCM_MART-1_r2
NDUFS5	0.15252	Coculture-T	IFNGR1mut.SKCM_MART-1_r2
UQCR11	0.21007	Coculture-T	IFNGR1mut.SKCM_MART-1_r2
NDUFS7	0.068459	Coculture-T	IFNGR1mut.SKCM_MART-1_r2
COX10	0.0074776	Coculture-T	IFNGR1mut.SKCM_MART-1_r2
COX6C	-0.10821	Coculture-T	IFNGR1mut.SKCM_MART-1_r2
NDUFB11	-0.11998	Coculture-T	IFNGR1mut.SKCM_MART-1_r2
NDUFB5	0.081233	Coculture-T	IFNGR1mut.SKCM_MART-1_r2
ATP6V0C	0.56405	Coculture-T	IFNGR1mut.SKCM_MART-1_r2
COX8A	-0.046927	Coculture-T	IFNGR1mut.SKCM_MART-1_r2
ATP6V0D2	0.060763	Coculture-T	IFNGR1mut.SKCM_MART-1_r2
NDUFV1	0.4609	Coculture-T	IFNGR1mut.SKCM_MART-1_r2
ATP6V1H	-0.092948	Coculture-T	IFNGR1mut.SKCM_MART-1_r2
NDUFS6	0.12764	Coculture-T	IFNGR1mut.SKCM_MART-1_r2
ATP4B	0.0055812	Coculture-T	IFNGR1mut.SKCM_MART-1_r2
ATP6V1G2	0.2074	Coculture-T	IFNGR1mut.SKCM_MART-1_r2
PPA1	0.097878	Coculture-T	IFNGR1mut.SKCM_MART-1_r2
SDHC	-0.0094229	Coculture-T	IFNGR1mut.SKCM_MART-1_r2
NDUFA1	0.076792	Coculture-T	IFNGR1mut.SKCM_MART-1_r2
COX7A2	0.047832	Coculture-T	IFNGR1mut.SKCM_MART-1_r2
NDUFA10	0.043775	Coculture-T	IFNGR1mut.SKCM_MART-1_r2
COX6B2	0.11405	Coculture-T	IFNGR1mut.SKCM_MART-1_r2
TCIRG1	-0.0011915	Coculture-T	IFNGR1mut.SKCM_MART-1_r2
COX7B	0.026125	Coculture-T	IFNGR1mut.SKCM_MART-1_r2
NDUFA12	0.17408	Coculture-T	IFNGR1mut.SKCM_MART-1_r2
CYC1	0.35009	Coculture-T	IFNGR1mut.SKCM_MART-1_r2
ATP6V0A4	0.2359	Coculture-T	IFNGR1mut.SKCM_MART-1_r2
COX15	0.4312	Coculture-T	IFNGR1mut.SKCM_MART-1_r2
ATP6AP1	0.74765	Coculture-T	IFNGR1mut.SKCM_MART-1_r2
COX6A1	0.19369	Coculture-T	IFNGR1mut.SKCM_MART-1_r2
UQCRHL	0.20673	Coculture-T	IFNGR1mut.SKCM_MART-1_r2
NDUFA8	0.16797	Coculture-T	IFNGR1mut.SKCM_MART-1_r2
ATP6V0E1	0.32919	Coculture-T	IFNGR1mut.SKCM_MART-1_r2
NDUFA7	0.1641	Coculture-T	IFNGR1mut.SKCM_MART-1_r2
NDUFB7	1.0414	Coculture-T	IFNGR1mut.SKCM_MART-1_r2
NDUFS1	0.50664	Coculture-T	IFNGR1mut.SKCM_MART-1_r2
ATP6V1G2	0.11955	Coculture-T	NALM6_CART
COX10	-1.0551	Coculture-T	NALM6_CART
ATP6V1G3	-0.534	Coculture-T	NALM6_CART
NDUFB10	-0.7983	Coculture-T	NALM6_CART
NDUFB6	0.099294	Coculture-T	NALM6_CART
ATP6V0A4	-0.11404	Coculture-T	NALM6_CART
NDUFC2-KCTD14	-0.98993	Coculture-T	NALM6_CART
ATP6V1B2	-0.47765	Coculture-T	NALM6_CART
ATP6V1E1	-0.17357	Coculture-T	NALM6_CART
ATP6V1E2	-0.81108	Coculture-T	NALM6_CART
TCIRG1	0.02768	Coculture-T	NALM6_CART
LHPP	-0.19172	Coculture-T	NALM6_CART
UQCRQ	-0.25117	Coculture-T	NALM6_CART
NDUFA3	0.16814	Coculture-T	NALM6_CART
NDUFA2	-0.82937	Coculture-T	NALM6_CART
ATP6V0E1	-0.3797	Coculture-T	NALM6_CART
SDHD	0.28336	Coculture-T	NALM6_CART
UQCR11	-0.40988	Coculture-T	NALM6_CART
COX6B1	-0.66167	Coculture-T	NALM6_CART
UQCRH	0.0097089	Coculture-T	NALM6_CART
ATP6V1C1	0.21104	Coculture-T	NALM6_CART
NDUFC1	-0.28255	Coculture-T	NALM6_CART
NDUFAB1	0.12594	Coculture-T	NALM6_CART
NDUFB9	0.19776	Coculture-T	NALM6_CART
COX6C	0.53923	Coculture-T	NALM6_CART
NDUFS6	-0.19867	Coculture-T	NALM6_CART
PPA2	-0.35231	Coculture-T	NALM6_CART
UQCRFS1	-0.070603	Coculture-T	NALM6_CART
ATP6V1H	0.040333	Coculture-T	NALM6_CART
NDUFA8	0.23978	Coculture-T	NALM6_CART
ATP6V1C2	-0.28848	Coculture-T	NALM6_CART
ATP6V0C	-0.36576	Coculture-T	NALM6_CART
COX6A2	0.097721	Coculture-T	NALM6_CART
ATP6V1A	-0.27574	Coculture-T	NALM6_CART
ATP12A	-0.062338	Coculture-T	NALM6_CART
COX7C	-0.20586	Coculture-T	NALM6_CART
ATP4A	-0.19846	Coculture-T	NALM6_CART
COX8A	-0.1344	Coculture-T	NALM6_CART
NDUFV3	-0.004494	Coculture-T	NALM6_CART
COX6A1	0.033822	Coculture-T	NALM6_CART
COX7A2L	0.25721	Coculture-T	NALM6_CART
NDUFA5	-0.13861	Coculture-T	NALM6_CART
NDUFB2	-0.11576	Coculture-T	NALM6_CART
NDUFA1	0.38473	Coculture-T	NALM6_CART
ATP6AP1	-0.060925	Coculture-T	NALM6_CART
NDUFA4L2	0.54966	Coculture-T	NALM6_CART
NDUFS5	0.080092	Coculture-T	NALM6_CART
NDUFA10	0.37657	Coculture-T	NALM6_CART
ATP6V1D	0.24452	Coculture-T	NALM6_CART
COX15	0.19805	Coculture-T	NALM6_CART
NDUFB5	0.20807	Coculture-T	NALM6_CART
NDUFB4	-0.045182	Coculture-T	NALM6_CART
ATP6V0A2	0.38702	Coculture-T	NALM6_CART
UQCRB	0.017489	Coculture-T	NALM6_CART
NDUFB3	-0.29894	Coculture-T	NALM6_CART
UQCRC1	0.076231	Coculture-T	NALM6_CART
SDHC	-0.04984	Coculture-T	NALM6_CART
NDUFB11	0.52122	Coculture-T	NALM6_CART
COX8C	-0.1931	Coculture-T	NALM6_CART
NDUFA12	0.89566	Coculture-T	NALM6_CART
ATP6V0D2	-0.042151	Coculture-T	NALM6_CART
ATP6V0B	0.063421	Coculture-T	NALM6_CART
COX6B2	-0.098914	Coculture-T	NALM6_CART
SDHA	0.18638	Coculture-T	NALM6_CART
ATP6V0E2	0.096914	Coculture-T	NALM6_CART
ATP6V1B1	-0.16021	Coculture-T	NALM6_CART
NDUFV2	0.27466	Coculture-T	NALM6_CART
COX7B	-0.17097	Coculture-T	NALM6_CART
NDUFB1	-0.014764	Coculture-T	NALM6_CART
ATP6V1F	0.42699	Coculture-T	NALM6_CART
NDUFS2	0.096334	Coculture-T	NALM6_CART
COX7A1	0.013649	Coculture-T	NALM6_CART
NDUFA4	0.033327	Coculture-T	NALM6_CART
ATP6V0D1	-0.23351	Coculture-T	NALM6_CART
NDUFA13	0.56685	Coculture-T	NALM6_CART
COX7B2	0.48806	Coculture-T	NALM6_CART
NDUFA9	-0.082298	Coculture-T	NALM6_CART
ATP6V0A1	0.58206	Coculture-T	NALM6_CART
UQCRHL	-0.13397	Coculture-T	NALM6_CART
COX17	-0.24099	Coculture-T	NALM6_CART
NDUFS7	0.48638	Coculture-T	NALM6_CART
NDUFV1	0.69645	Coculture-T	NALM6_CART
CYC1	0.11756	Coculture-T	NALM6_CART
NDUFB8	-0.017618	Coculture-T	NALM6_CART
UQCR10	0.37037	Coculture-T	NALM6_CART
PPA1	0.51631	Coculture-T	NALM6_CART
ATP4B	0.081794	Coculture-T	NALM6_CART
NDUFA7	0.043039	Coculture-T	NALM6_CART
NDUFS4	0.54446	Coculture-T	NALM6_CART
COX5B	-0.079968	Coculture-T	NALM6_CART
COX4I1	-0.14203	Coculture-T	NALM6_CART
UQCRC2	-0.043697	Coculture-T	NALM6_CART
NDUFA6	-0.12166	Coculture-T	NALM6_CART
SDHB	0.3727	Coculture-T	NALM6_CART
NDUFS3	-0.19388	Coculture-T	NALM6_CART
NDUFS1	0.27536	Coculture-T	NALM6_CART
ATP6V1G1	0.16225	Coculture-T	NALM6_CART
COX7A2	-9.7211e-05	Coculture-T	NALM6_CART
NDUFA11	0.52657	Coculture-T	NALM6_CART
COX11	0.40063	Coculture-T	NALM6_CART
NDUFB7	0.0077192	Coculture-T	NALM6_CART
NDUFS8	0.48133	Coculture-T	NALM6_CART
COX4I2	0.2352	Coculture-T	NALM6_CART
NDUFC2	0.2033	Coculture-T	NALM6_CART
COX5A	0.55568	Coculture-T	NALM6_CART
UQCRC2	-0.42352	Coculture-T	Jeko-1_CD3.bispecificAb
NDUFB7	0.13293	Coculture-T	Jeko-1_CD3.bispecificAb
ATP6AP1	-0.35313	Coculture-T	Jeko-1_CD3.bispecificAb
COX17	0.098059	Coculture-T	Jeko-1_CD3.bispecificAb
NDUFA1	-0.067739	Coculture-T	Jeko-1_CD3.bispecificAb
COX6B1	-0.09466	Coculture-T	Jeko-1_CD3.bispecificAb
NDUFA10	-0.074402	Coculture-T	Jeko-1_CD3.bispecificAb
UQCRHL	-0.15953	Coculture-T	Jeko-1_CD3.bispecificAb
NDUFS5	-0.043136	Coculture-T	Jeko-1_CD3.bispecificAb
COX7B2	-0.099186	Coculture-T	Jeko-1_CD3.bispecificAb
COX7A1	-0.1623	Coculture-T	Jeko-1_CD3.bispecificAb
ATP6V1G3	-0.12828	Coculture-T	Jeko-1_CD3.bispecificAb
NDUFA12	0.0063663	Coculture-T	Jeko-1_CD3.bispecificAb
COX6C	-0.0709	Coculture-T	Jeko-1_CD3.bispecificAb
NDUFB8	0.063769	Coculture-T	Jeko-1_CD3.bispecificAb
COX7B	-0.066482	Coculture-T	Jeko-1_CD3.bispecificAb
UQCRC1	0.11167	Coculture-T	Jeko-1_CD3.bispecificAb
ATP6V1E2	0.046282	Coculture-T	Jeko-1_CD3.bispecificAb
COX6A1	-0.058117	Coculture-T	Jeko-1_CD3.bispecificAb
ATP6V1F	0.006501	Coculture-T	Jeko-1_CD3.bispecificAb
SDHD	-0.15298	Coculture-T	Jeko-1_CD3.bispecificAb
ATP6V0D2	-0.14497	Coculture-T	Jeko-1_CD3.bispecificAb
NDUFS7	0.11388	Coculture-T	Jeko-1_CD3.bispecificAb
PPA2	-0.27094	Coculture-T	Jeko-1_CD3.bispecificAb
NDUFS8	0.18197	Coculture-T	Jeko-1_CD3.bispecificAb
NDUFA5	0.035184	Coculture-T	Jeko-1_CD3.bispecificAb
ATP6V1G2	-0.20734	Coculture-T	Jeko-1_CD3.bispecificAb
ATP6V0E2	0.15683	Coculture-T	Jeko-1_CD3.bispecificAb
NDUFAB1	-0.039225	Coculture-T	Jeko-1_CD3.bispecificAb
NDUFA7	-0.082783	Coculture-T	Jeko-1_CD3.bispecificAb
UQCRQ	-0.0098389	Coculture-T	Jeko-1_CD3.bispecificAb
NDUFA8	0.013757	Coculture-T	Jeko-1_CD3.bispecificAb
ATP6V1E1	-0.054128	Coculture-T	Jeko-1_CD3.bispecificAb
PPA1	-0.080865	Coculture-T	Jeko-1_CD3.bispecificAb
COX10	-0.18378	Coculture-T	Jeko-1_CD3.bispecificAb
ATP6V0E1	0.12078	Coculture-T	Jeko-1_CD3.bispecificAb
NDUFS6	-0.10741	Coculture-T	Jeko-1_CD3.bispecificAb
NDUFS2	0.0020065	Coculture-T	Jeko-1_CD3.bispecificAb
ATP6V1B1	-0.03399	Coculture-T	Jeko-1_CD3.bispecificAb
COX5B	0.053095	Coculture-T	Jeko-1_CD3.bispecificAb
NDUFB6	0.087823	Coculture-T	Jeko-1_CD3.bispecificAb
ATP6V1D	0.25579	Coculture-T	Jeko-1_CD3.bispecificAb
ATP12A	-0.018923	Coculture-T	Jeko-1_CD3.bispecificAb
NDUFS3	-0.098716	Coculture-T	Jeko-1_CD3.bispecificAb
ATP6V1B2	-0.15954	Coculture-T	Jeko-1_CD3.bispecificAb
ATP6V1C2	0.22517	Coculture-T	Jeko-1_CD3.bispecificAb
SDHA	-0.084922	Coculture-T	Jeko-1_CD3.bispecificAb
NDUFC2	0.068282	Coculture-T	Jeko-1_CD3.bispecificAb
ATP6V1H	-0.087574	Coculture-T	Jeko-1_CD3.bispecificAb
ATP6V0A4	-0.10159	Coculture-T	Jeko-1_CD3.bispecificAb
NDUFA13	-0.12683	Coculture-T	Jeko-1_CD3.bispecificAb
NDUFB1	0.069185	Coculture-T	Jeko-1_CD3.bispecificAb
UQCRFS1	-0.142	Coculture-T	Jeko-1_CD3.bispecificAb
CYC1	0.077558	Coculture-T	Jeko-1_CD3.bispecificAb
NDUFA11	0.010891	Coculture-T	Jeko-1_CD3.bispecificAb
SDHB	0.072094	Coculture-T	Jeko-1_CD3.bispecificAb
ATP6V0C	-0.15007	Coculture-T	Jeko-1_CD3.bispecificAb
ATP6V1C1	-0.11943	Coculture-T	Jeko-1_CD3.bispecificAb
UQCRB	-0.10422	Coculture-T	Jeko-1_CD3.bispecificAb
ATP6V0D1	0.03432	Coculture-T	Jeko-1_CD3.bispecificAb
NDUFB11	-0.059998	Coculture-T	Jeko-1_CD3.bispecificAb
ATP6V0A2	-0.087047	Coculture-T	Jeko-1_CD3.bispecificAb
NDUFA2	0.1097	Coculture-T	Jeko-1_CD3.bispecificAb
ATP6V0B	0.070079	Coculture-T	Jeko-1_CD3.bispecificAb
NDUFV3	0.038242	Coculture-T	Jeko-1_CD3.bispecificAb
COX7C	-0.1061	Coculture-T	Jeko-1_CD3.bispecificAb
COX8A	0.09919	Coculture-T	Jeko-1_CD3.bispecificAb
NDUFC1	0.081898	Coculture-T	Jeko-1_CD3.bispecificAb
ATP4A	-0.0041539	Coculture-T	Jeko-1_CD3.bispecificAb
NDUFB9	-0.087448	Coculture-T	Jeko-1_CD3.bispecificAb
TCIRG1	0.10787	Coculture-T	Jeko-1_CD3.bispecificAb
COX4I2	-0.058386	Coculture-T	Jeko-1_CD3.bispecificAb
COX6A2	-0.035179	Coculture-T	Jeko-1_CD3.bispecificAb
COX7A2L	0.045888	Coculture-T	Jeko-1_CD3.bispecificAb
NDUFV1	-0.062163	Coculture-T	Jeko-1_CD3.bispecificAb
NDUFB3	0.18487	Coculture-T	Jeko-1_CD3.bispecificAb
COX5A	0.057591	Coculture-T	Jeko-1_CD3.bispecificAb
COX8C	0.090874	Coculture-T	Jeko-1_CD3.bispecificAb
NDUFA6	0.45966	Coculture-T	Jeko-1_CD3.bispecificAb
ATP6V1G1	0.13631	Coculture-T	Jeko-1_CD3.bispecificAb
NDUFA9	0.027202	Coculture-T	Jeko-1_CD3.bispecificAb
NDUFA4	0.020282	Coculture-T	Jeko-1_CD3.bispecificAb
NDUFA3	0.40589	Coculture-T	Jeko-1_CD3.bispecificAb
NDUFB2	0.35137	Coculture-T	Jeko-1_CD3.bispecificAb
UQCR10	0.09097	Coculture-T	Jeko-1_CD3.bispecificAb
NDUFB4	0.047851	Coculture-T	Jeko-1_CD3.bispecificAb
COX4I1	0.17237	Coculture-T	Jeko-1_CD3.bispecificAb
COX11	0.017121	Coculture-T	Jeko-1_CD3.bispecificAb
SDHC	0.12417	Coculture-T	Jeko-1_CD3.bispecificAb
COX7A2	0.055585	Coculture-T	Jeko-1_CD3.bispecificAb
ATP6V1A	0.11576	Coculture-T	Jeko-1_CD3.bispecificAb
NDUFS4	0.16873	Coculture-T	Jeko-1_CD3.bispecificAb
UQCR11	0.13672	Coculture-T	Jeko-1_CD3.bispecificAb
LHPP	0.080555	Coculture-T	Jeko-1_CD3.bispecificAb
COX6B2	0.31359	Coculture-T	Jeko-1_CD3.bispecificAb
NDUFB5	0.081106	Coculture-T	Jeko-1_CD3.bispecificAb
COX15	0.063432	Coculture-T	Jeko-1_CD3.bispecificAb
ATP4B	0.068969	Coculture-T	Jeko-1_CD3.bispecificAb
NDUFA4L2	0.10651	Coculture-T	Jeko-1_CD3.bispecificAb
UQCRH	0.11386	Coculture-T	Jeko-1_CD3.bispecificAb
NDUFB10	0.19858	Coculture-T	Jeko-1_CD3.bispecificAb
ATP6V0A1	0.48636	Coculture-T	Jeko-1_CD3.bispecificAb
NDUFS1	0.16067	Coculture-T	Jeko-1_CD3.bispecificAb
NDUFV2	0.45552	Coculture-T	Jeko-1_CD3.bispecificAb

## Sheet: TabS4
S4: Log fold change of MHC-I protien expression upon knockout of OXPHOS genes
Genesymbol	LFC	type	experiment
COX11	-6.0906	MHC-I low	B16F10_M1.posScreen.MHCI.low
ATP6V0A1	-7.6569	MHC-I low	B16F10_M1.posScreen.MHCI.low
SDHD	-6.4529	MHC-I low	B16F10_M1.posScreen.MHCI.low
CYC1	-6.9321	MHC-I low	B16F10_M1.posScreen.MHCI.low
NDUFA12	-6.4504	MHC-I low	B16F10_M1.posScreen.MHCI.low
COX6A1	-6.5064	MHC-I low	B16F10_M1.posScreen.MHCI.low
COX7B2	-6.6934	MHC-I low	B16F10_M1.posScreen.MHCI.low
ATP6AP1	-7.359	MHC-I low	B16F10_M1.posScreen.MHCI.low
NDUFB2	-7.81	MHC-I low	B16F10_M1.posScreen.MHCI.low
NDUFB6	-7.3199	MHC-I low	B16F10_M1.posScreen.MHCI.low
ATP6V0A2	-6.7252	MHC-I low	B16F10_M1.posScreen.MHCI.low
LHPP	0.24036	MHC-I low	B16F10_M1.posScreen.MHCI.low
COX6B1	-6.0433	MHC-I low	B16F10_M1.posScreen.MHCI.low
NDUFA6	-6.6858	MHC-I low	B16F10_M1.posScreen.MHCI.low
ATP6V0A4	-6.9349	MHC-I low	B16F10_M1.posScreen.MHCI.low
NDUFB4	-6.856	MHC-I low	B16F10_M1.posScreen.MHCI.low
NDUFA2	-6.2773	MHC-I low	B16F10_M1.posScreen.MHCI.low
NDUFA13	-5.9825	MHC-I low	B16F10_M1.posScreen.MHCI.low
COX7A1	-7.7649	MHC-I low	B16F10_M1.posScreen.MHCI.low
NDUFA1	-7.0933	MHC-I low	B16F10_M1.posScreen.MHCI.low
NDUFS5	-7.6309	MHC-I low	B16F10_M1.posScreen.MHCI.low
COX7A2	-6.0773	MHC-I low	B16F10_M1.posScreen.MHCI.low
NDUFS3	-6.4487	MHC-I low	B16F10_M1.posScreen.MHCI.low
UQCR10	-6.4056	MHC-I low	B16F10_M1.posScreen.MHCI.low
NDUFB5	-6.4937	MHC-I low	B16F10_M1.posScreen.MHCI.low
ATP6V1C2	-5.2725	MHC-I low	B16F10_M1.posScreen.MHCI.low
ATP6V1G1	-3.4648	MHC-I low	B16F10_M1.posScreen.MHCI.low
ATP6V1B1	-6.3008	MHC-I low	B16F10_M1.posScreen.MHCI.low
NDUFB7	-6.4077	MHC-I low	B16F10_M1.posScreen.MHCI.low
ATP6V0E2	-2.6175	MHC-I low	B16F10_M1.posScreen.MHCI.low
ATP4A	-2.4311	MHC-I low	B16F10_M1.posScreen.MHCI.low
COX7C	-4.8422	MHC-I low	B16F10_M1.posScreen.MHCI.low
NDUFV2	-6.7338	MHC-I low	B16F10_M1.posScreen.MHCI.low
COX8C	-6.6461	MHC-I low	B16F10_M1.posScreen.MHCI.low
NDUFV3	-1.9203	MHC-I low	B16F10_M1.posScreen.MHCI.low
SDHA	-6.6001	MHC-I low	B16F10_M1.posScreen.MHCI.low
UQCRH	-6.6818	MHC-I low	B16F10_M1.posScreen.MHCI.low
NDUFA3	-6.5814	MHC-I low	B16F10_M1.posScreen.MHCI.low
NDUFB9	-6.0773	MHC-I low	B16F10_M1.posScreen.MHCI.low
NDUFC1	-5.8353	MHC-I low	B16F10_M1.posScreen.MHCI.low
NDUFB11	-6.6279	MHC-I low	B16F10_M1.posScreen.MHCI.low
COX7B	-7.2018	MHC-I low	B16F10_M1.posScreen.MHCI.low
COX6A2	-5.1635	MHC-I low	B16F10_M1.posScreen.MHCI.low
COX15	-3.8149	MHC-I low	B16F10_M1.posScreen.MHCI.low
COX10	-6.9172	MHC-I low	B16F10_M1.posScreen.MHCI.low
NDUFA4	-6.513	MHC-I low	B16F10_M1.posScreen.MHCI.low
ATP6V1G2	-6.8164	MHC-I low	B16F10_M1.posScreen.MHCI.low
COX6C	-6.664	MHC-I low	B16F10_M1.posScreen.MHCI.low
NDUFB8	-5.9067	MHC-I low	B16F10_M1.posScreen.MHCI.low
UQCRFS1	-5.2489	MHC-I low	B16F10_M1.posScreen.MHCI.low
NDUFA10	-6.5908	MHC-I low	B16F10_M1.posScreen.MHCI.low
COX6B2	-3.6112	MHC-I low	B16F10_M1.posScreen.MHCI.low
UQCRC2	-6.0353	MHC-I low	B16F10_M1.posScreen.MHCI.low
NDUFA5	-4.3886	MHC-I low	B16F10_M1.posScreen.MHCI.low
NDUFA4L2	-3.9224	MHC-I low	B16F10_M1.posScreen.MHCI.low
NDUFS6	-6.5814	MHC-I low	B16F10_M1.posScreen.MHCI.low
NDUFC2	-5.9217	MHC-I low	B16F10_M1.posScreen.MHCI.low
ATP6V1E2	-2.0001	MHC-I low	B16F10_M1.posScreen.MHCI.low
ATP6V1F	-6.234	MHC-I low	B16F10_M1.posScreen.MHCI.low
UQCRC1	-6.0365	MHC-I low	B16F10_M1.posScreen.MHCI.low
UQCRQ	-6.5623	MHC-I low	B16F10_M1.posScreen.MHCI.low
NDUFS1	-6.5527	MHC-I low	B16F10_M1.posScreen.MHCI.low
ATP6V1D	-6.2847	MHC-I low	B16F10_M1.posScreen.MHCI.low
ATP4B	-2.6948	MHC-I low	B16F10_M1.posScreen.MHCI.low
COX7A2L	-6.3004	MHC-I low	B16F10_M1.posScreen.MHCI.low
COX17	-5.3633	MHC-I low	B16F10_M1.posScreen.MHCI.low
NDUFV1	-6.3345	MHC-I low	B16F10_M1.posScreen.MHCI.low
COX4I1	-6.6163	MHC-I low	B16F10_M1.posScreen.MHCI.low
NDUFB3	-5.8131	MHC-I low	B16F10_M1.posScreen.MHCI.low
PPA2	-0.17042	MHC-I low	B16F10_M1.posScreen.MHCI.low
COX5A	-4.2719	MHC-I low	B16F10_M1.posScreen.MHCI.low
COX8A	0.16712	MHC-I low	B16F10_M1.posScreen.MHCI.low
NDUFS8	-3.3804	MHC-I low	B16F10_M1.posScreen.MHCI.low
SDHB	-6.2656	MHC-I low	B16F10_M1.posScreen.MHCI.low
COX5B	0.41469	MHC-I low	B16F10_M1.posScreen.MHCI.low
ATP6V0D1	-4.8386	MHC-I low	B16F10_M1.posScreen.MHCI.low
SDHC	-5.7131	MHC-I low	B16F10_M1.posScreen.MHCI.low
NDUFA9	-3.0007	MHC-I low	B16F10_M1.posScreen.MHCI.low
NDUFB10	-5.2457	MHC-I low	B16F10_M1.posScreen.MHCI.low
NDUFAB1	-5.9945	MHC-I low	B16F10_M1.posScreen.MHCI.low
NDUFA8	-4.352	MHC-I low	B16F10_M1.posScreen.MHCI.low
ATP6V1E1	-6.2773	MHC-I low	B16F10_M1.posScreen.MHCI.low
COX4I2	-4.2792	MHC-I low	B16F10_M1.posScreen.MHCI.low
NDUFS4	-5.7836	MHC-I low	B16F10_M1.posScreen.MHCI.low
TCIRG1	2.3126	MHC-I low	B16F10_M1.posScreen.MHCI.low
NDUFS2	-4.8386	MHC-I low	B16F10_M1.posScreen.MHCI.low
PPA1	-4.3094	MHC-I low	B16F10_M1.posScreen.MHCI.low
ATP6V1B2	-4.8699	MHC-I low	B16F10_M1.posScreen.MHCI.low
UQCRB	-4.9599	MHC-I low	B16F10_M1.posScreen.MHCI.low
NDUFS7	-6.0638	MHC-I low	B16F10_M1.posScreen.MHCI.low
NDUFA7	-5.6604	MHC-I low	B16F10_M1.posScreen.MHCI.low
ATP6V1A	-4.1767	MHC-I low	B16F10_M1.posScreen.MHCI.low
ATP6V0B	-5.3186	MHC-I low	B16F10_M1.posScreen.MHCI.low
ATP6V1C1	-1.5274	MHC-I low	B16F10_M1.posScreen.MHCI.low
ATP6V1H	-1.1732	MHC-I low	B16F10_M1.posScreen.MHCI.low
UQCRH	-5.8649	MHC-I high	K562_MHCI_r1
ATP6V1A	-4.9799	MHC-I high	K562_MHCI_r1
COX5A	-2.0641	MHC-I high	K562_MHCI_r1
ATP6V0A1	-0.020669	MHC-I high	K562_MHCI_r1
SDHD	-1.4325	MHC-I high	K562_MHCI_r1
NDUFS2	-0.2922	MHC-I high	K562_MHCI_r1
NDUFA4L2	-0.49519	MHC-I high	K562_MHCI_r1
COX4I2	-0.79454	MHC-I high	K562_MHCI_r1
ATP6V1E1	-0.40997	MHC-I high	K562_MHCI_r1
COX6A1	-0.55356	MHC-I high	K562_MHCI_r1
NDUFV1	0.54981	MHC-I high	K562_MHCI_r1
ATP6V1C2	-0.67756	MHC-I high	K562_MHCI_r1
NDUFC1	-0.74879	MHC-I high	K562_MHCI_r1
UQCR11	0.99865	MHC-I high	K562_MHCI_r1
COX4I1	-0.12928	MHC-I high	K562_MHCI_r1
ATP12A	-1.0938	MHC-I high	K562_MHCI_r1
COX7C	0.87063	MHC-I high	K562_MHCI_r1
COX6A2	-0.69694	MHC-I high	K562_MHCI_r1
ATP6V1G3	-0.42612	MHC-I high	K562_MHCI_r1
NDUFB3	0.555	MHC-I high	K562_MHCI_r1
ATP6V0C	-0.39176	MHC-I high	K562_MHCI_r1
SDHB	-0.45981	MHC-I high	K562_MHCI_r1
ATP6V1G2	0.13363	MHC-I high	K562_MHCI_r1
PPA2	-0.47545	MHC-I high	K562_MHCI_r1
ATP6AP1	-0.042402	MHC-I high	K562_MHCI_r1
NDUFA9	0.11208	MHC-I high	K562_MHCI_r1
NDUFS8	-0.076225	MHC-I high	K562_MHCI_r1
SDHC	-0.65636	MHC-I high	K562_MHCI_r1
NDUFV3	0.41172	MHC-I high	K562_MHCI_r1
COX7B	-0.40093	MHC-I high	K562_MHCI_r1
UQCRFS1	-2.65	MHC-I high	K562_MHCI_r1
COX7A2	-0.57574	MHC-I high	K562_MHCI_r1
ATP4A	0.34996	MHC-I high	K562_MHCI_r1
NDUFS6	-0.29376	MHC-I high	K562_MHCI_r1
NDUFA6	0.53741	MHC-I high	K562_MHCI_r1
NDUFB11	0.38718	MHC-I high	K562_MHCI_r1
NDUFB1	-0.085952	MHC-I high	K562_MHCI_r1
UQCRC1	1.0926	MHC-I high	K562_MHCI_r1
NDUFAB1	0.6595	MHC-I high	K562_MHCI_r1
COX17	0.79467	MHC-I high	K562_MHCI_r1
NDUFB4	1.0252	MHC-I high	K562_MHCI_r1
LHPP	-0.054634	MHC-I high	K562_MHCI_r1
TCIRG1	-0.33615	MHC-I high	K562_MHCI_r1
COX15	0.455	MHC-I high	K562_MHCI_r1
ATP6V0A4	0.69245	MHC-I high	K562_MHCI_r1
NDUFS3	1.0286	MHC-I high	K562_MHCI_r1
COX7B2	-0.31065	MHC-I high	K562_MHCI_r1
NDUFA12	0.94982	MHC-I high	K562_MHCI_r1
COX8A	0.26158	MHC-I high	K562_MHCI_r1
ATP6V1B2	-0.076134	MHC-I high	K562_MHCI_r1
COX7A2L	-0.16754	MHC-I high	K562_MHCI_r1
ATP6V0D2	0.0023258	MHC-I high	K562_MHCI_r1
NDUFA11	0.94312	MHC-I high	K562_MHCI_r1
SDHA	5.7914	MHC-I high	K562_MHCI_r1
ATP6V1F	1.6689	MHC-I high	K562_MHCI_r1
COX8C	0.2931	MHC-I high	K562_MHCI_r1
NDUFB2	1.3747	MHC-I high	K562_MHCI_r1
NDUFB6	0.27062	MHC-I high	K562_MHCI_r1
NDUFA2	0.15108	MHC-I high	K562_MHCI_r1
ATP6V0B	-0.040911	MHC-I high	K562_MHCI_r1
COX10	1.1571	MHC-I high	K562_MHCI_r1
UQCRC2	3.2658	MHC-I high	K562_MHCI_r1
COX6C	0.58155	MHC-I high	K562_MHCI_r1
NDUFB8	-0.41001	MHC-I high	K562_MHCI_r1
ATP6V0D1	-0.20037	MHC-I high	K562_MHCI_r1
COX6B1	2.1025	MHC-I high	K562_MHCI_r1
CYC1	0.8126	MHC-I high	K562_MHCI_r1
ATP6V1E2	-0.21668	MHC-I high	K562_MHCI_r1
NDUFS4	0.013875	MHC-I high	K562_MHCI_r1
UQCRB	0.11519	MHC-I high	K562_MHCI_r1
COX6B2	0.12424	MHC-I high	K562_MHCI_r1
UQCRQ	-0.41591	MHC-I high	K562_MHCI_r1
COX5B	-0.11846	MHC-I high	K562_MHCI_r1
ATP6V1B1	0.13136	MHC-I high	K562_MHCI_r1
COX11	1.1781	MHC-I high	K562_MHCI_r1
NDUFB9	0.68071	MHC-I high	K562_MHCI_r1
NDUFA1	0.095611	MHC-I high	K562_MHCI_r1
ATP6V0E2	0.10829	MHC-I high	K562_MHCI_r1
ATP4B	0.092736	MHC-I high	K562_MHCI_r1
NDUFB10	1.1078	MHC-I high	K562_MHCI_r1
NDUFA3	-0.088779	MHC-I high	K562_MHCI_r1
NDUFA8	2.7167	MHC-I high	K562_MHCI_r1
COX7A1	0.36592	MHC-I high	K562_MHCI_r1
ATP6V1H	0.62682	MHC-I high	K562_MHCI_r1
NDUFB5	0.78043	MHC-I high	K562_MHCI_r1
ATP6V1C1	1.529	MHC-I high	K562_MHCI_r1
NDUFA5	0.24085	MHC-I high	K562_MHCI_r1
NDUFB7	0.57469	MHC-I high	K562_MHCI_r1
ATP6V0E1	0.72477	MHC-I high	K562_MHCI_r1
NDUFA7	0.26041	MHC-I high	K562_MHCI_r1
NDUFS1	0.65095	MHC-I high	K562_MHCI_r1
NDUFS5	0.60718	MHC-I high	K562_MHCI_r1
NDUFA4	0.89781	MHC-I high	K562_MHCI_r1
ATP6V1G1	0.22572	MHC-I high	K562_MHCI_r1
NDUFV2	2.2098	MHC-I high	K562_MHCI_r1
ATP6V1D	0.62381	MHC-I high	K562_MHCI_r1
PPA1	2.2192	MHC-I high	K562_MHCI_r1
NDUFA10	2.0067	MHC-I high	K562_MHCI_r1
NDUFS7	0.40382	MHC-I high	K562_MHCI_r1
NDUFA13	1.2886	MHC-I high	K562_MHCI_r1
UQCR10	1.1864	MHC-I high	K562_MHCI_r1
NDUFC2-KCTD14	0.95753	MHC-I high	K562_MHCI_r1
ATP6V0A2	1.7053	MHC-I high	K562_MHCI_r1
NDUFC2	0.95753	MHC-I high	K562_MHCI_r1
COX4I2	-1.3613	MHC-I high	K562_MHCI_r2
NDUFA13	-5.7678	MHC-I high	K562_MHCI_r2
NDUFA12	-0.24322	MHC-I high	K562_MHCI_r2
NDUFV1	-0.066752	MHC-I high	K562_MHCI_r2
COX6B2	-0.79344	MHC-I high	K562_MHCI_r2
ATP6V1B2	-1.0812	MHC-I high	K562_MHCI_r2
ATP6V0C	-1.6345	MHC-I high	K562_MHCI_r2
NDUFAB1	-2.5299	MHC-I high	K562_MHCI_r2
ATP4A	-0.74012	MHC-I high	K562_MHCI_r2
ATP6V1E2	-0.51853	MHC-I high	K562_MHCI_r2
COX6A2	-0.92976	MHC-I high	K562_MHCI_r2
NDUFS2	2.2757	MHC-I high	K562_MHCI_r2
COX6C	-3.6633	MHC-I high	K562_MHCI_r2
NDUFS6	-0.10199	MHC-I high	K562_MHCI_r2
ATP6V1E1	-1.0885	MHC-I high	K562_MHCI_r2
PPA2	-0.42592	MHC-I high	K562_MHCI_r2
ATP6V1G3	0.045621	MHC-I high	K562_MHCI_r2
ATP12A	-1.4646	MHC-I high	K562_MHCI_r2
ATP6V0D1	-0.90787	MHC-I high	K562_MHCI_r2
TCIRG1	-0.52656	MHC-I high	K562_MHCI_r2
UQCRFS1	-3.3205	MHC-I high	K562_MHCI_r2
ATP6V1G1	-1.0034	MHC-I high	K562_MHCI_r2
SDHB	0.57907	MHC-I high	K562_MHCI_r2
SDHC	-1.3773	MHC-I high	K562_MHCI_r2
COX5B	-0.24988	MHC-I high	K562_MHCI_r2
NDUFA2	0.054308	MHC-I high	K562_MHCI_r2
COX6B1	-3.4653	MHC-I high	K562_MHCI_r2
NDUFB3	2.0453	MHC-I high	K562_MHCI_r2
ATP6V0D2	-0.6629	MHC-I high	K562_MHCI_r2
UQCR11	2.0932	MHC-I high	K562_MHCI_r2
COX6A1	-0.6198	MHC-I high	K562_MHCI_r2
NDUFS8	-0.18386	MHC-I high	K562_MHCI_r2
SDHD	-0.66945	MHC-I high	K562_MHCI_r2
NDUFA5	-0.87521	MHC-I high	K562_MHCI_r2
UQCRH	-0.16196	MHC-I high	K562_MHCI_r2
COX4I1	-1.4929	MHC-I high	K562_MHCI_r2
ATP6V1F	-1.9699	MHC-I high	K562_MHCI_r2
NDUFA4L2	0.0038908	MHC-I high	K562_MHCI_r2
NDUFS5	5.8669	MHC-I high	K562_MHCI_r2
ATP6V0E2	0.10277	MHC-I high	K562_MHCI_r2
NDUFB7	0.40836	MHC-I high	K562_MHCI_r2
COX7C	-0.21374	MHC-I high	K562_MHCI_r2
UQCRC1	0.98602	MHC-I high	K562_MHCI_r2
NDUFA6	1.5233	MHC-I high	K562_MHCI_r2
UQCRB	-0.67807	MHC-I high	K562_MHCI_r2
NDUFV3	0.22272	MHC-I high	K562_MHCI_r2
LHPP	0.41632	MHC-I high	K562_MHCI_r2
ATP6V0E1	0.14417	MHC-I high	K562_MHCI_r2
COX7B2	0.7074	MHC-I high	K562_MHCI_r2
NDUFA8	0.10821	MHC-I high	K562_MHCI_r2
ATP6V0A4	-0.32974	MHC-I high	K562_MHCI_r2
SDHA	-0.90709	MHC-I high	K562_MHCI_r2
ATP6V1H	0.078191	MHC-I high	K562_MHCI_r2
COX7A2	0.35739	MHC-I high	K562_MHCI_r2
NDUFA10	-0.1942	MHC-I high	K562_MHCI_r2
NDUFB10	3.5933	MHC-I high	K562_MHCI_r2
COX11	2.2427	MHC-I high	K562_MHCI_r2
NDUFC2	-0.224	MHC-I high	K562_MHCI_r2
NDUFC2-KCTD14	-0.13798	MHC-I high	K562_MHCI_r2
NDUFC1	0.90103	MHC-I high	K562_MHCI_r2
COX7A1	0.13121	MHC-I high	K562_MHCI_r2
NDUFA11	2.6734	MHC-I high	K562_MHCI_r2
NDUFB4	-0.21352	MHC-I high	K562_MHCI_r2
ATP4B	0.12347	MHC-I high	K562_MHCI_r2
NDUFA7	1.5947	MHC-I high	K562_MHCI_r2
ATP6V0A2	0.30565	MHC-I high	K562_MHCI_r2
NDUFS4	-0.097178	MHC-I high	K562_MHCI_r2
NDUFB1	0.59006	MHC-I high	K562_MHCI_r2
NDUFB8	3.1557	MHC-I high	K562_MHCI_r2
UQCR10	5.4306	MHC-I high	K562_MHCI_r2
ATP6V0A1	0.53103	MHC-I high	K562_MHCI_r2
NDUFB11	1.3873	MHC-I high	K562_MHCI_r2
ATP6V1B1	0.15479	MHC-I high	K562_MHCI_r2
ATP6AP1	0.74456	MHC-I high	K562_MHCI_r2
ATP6V1C1	0.47712	MHC-I high	K562_MHCI_r2
NDUFS7	0.22689	MHC-I high	K562_MHCI_r2
ATP6V1G2	1.3837	MHC-I high	K562_MHCI_r2
COX8C	0.62143	MHC-I high	K562_MHCI_r2
CYC1	1.3075	MHC-I high	K562_MHCI_r2
NDUFB5	0.74921	MHC-I high	K562_MHCI_r2
UQCRQ	0.33339	MHC-I high	K562_MHCI_r2
NDUFV2	1.7696	MHC-I high	K562_MHCI_r2
NDUFS1	0.73833	MHC-I high	K562_MHCI_r2
NDUFA1	0.6883	MHC-I high	K562_MHCI_r2
PPA1	4.9179	MHC-I high	K562_MHCI_r2
COX10	0.3693	MHC-I high	K562_MHCI_r2
NDUFA4	0.80794	MHC-I high	K562_MHCI_r2
COX17	1.3123	MHC-I high	K562_MHCI_r2
ATP6V1D	2.2653	MHC-I high	K562_MHCI_r2
NDUFB2	0.3773	MHC-I high	K562_MHCI_r2
NDUFA3	0.17139	MHC-I high	K562_MHCI_r2
NDUFA9	2.2004	MHC-I high	K562_MHCI_r2
COX5A	0.69552	MHC-I high	K562_MHCI_r2
COX7A2L	0.89817	MHC-I high	K562_MHCI_r2
UQCRC2	1.1939	MHC-I high	K562_MHCI_r2
COX15	2.1932	MHC-I high	K562_MHCI_r2
COX7B	0.78668	MHC-I high	K562_MHCI_r2
NDUFB9	0.75351	MHC-I high	K562_MHCI_r2
ATP6V1A	5.4676	MHC-I high	K562_MHCI_r2
ATP6V0B	0.81865	MHC-I high	K562_MHCI_r2
NDUFS3	0.59118	MHC-I high	K562_MHCI_r2
ATP6V1C2	0.30068	MHC-I high	K562_MHCI_r2
NDUFB6	3.1531	MHC-I high	K562_MHCI_r2
COX8A	0.9451	MHC-I high	K562_MHCI_r2
ATP12A	-9.721	MHC-I high	K562_HLA-B.High
ATP6V1B1	-9.4689	MHC-I high	K562_HLA-B.High
NDUFAB1	-8.5092	MHC-I high	K562_HLA-B.High
NDUFA3	-9.6156	MHC-I high	K562_HLA-B.High
NDUFA10	-9.0929	MHC-I high	K562_HLA-B.High
ATP6V0E1	-9.3262	MHC-I high	K562_HLA-B.High
ATP4A	-9.2023	MHC-I high	K562_HLA-B.High
ATP6V0A2	-9.2483	MHC-I high	K562_HLA-B.High
NDUFV2	-9.3254	MHC-I high	K562_HLA-B.High
NDUFC1	-8.5993	MHC-I high	K562_HLA-B.High
NDUFB4	-9.3964	MHC-I high	K562_HLA-B.High
ATP4B	-9.3232	MHC-I high	K562_HLA-B.High
PPA1	-9.3891	MHC-I high	K562_HLA-B.High
NDUFS3	-8.9169	MHC-I high	K562_HLA-B.High
COX6A1	-9.259	MHC-I high	K562_HLA-B.High
NDUFA9	-8.7108	MHC-I high	K562_HLA-B.High
ATP6V1C1	-9.346	MHC-I high	K562_HLA-B.High
COX6A2	-8.825	MHC-I high	K562_HLA-B.High
CYC1	-9.3425	MHC-I high	K562_HLA-B.High
NDUFB5	-9.1182	MHC-I high	K562_HLA-B.High
ATP6V1G2	-9.213	MHC-I high	K562_HLA-B.High
UQCRC2	-8.2486	MHC-I high	K562_HLA-B.High
ATP6V1B2	-9.1378	MHC-I high	K562_HLA-B.High
NDUFA2	-7.7426	MHC-I high	K562_HLA-B.High
SDHA	-9.0473	MHC-I high	K562_HLA-B.High
COX6B1	-8.4478	MHC-I high	K562_HLA-B.High
SDHC	-9.1627	MHC-I high	K562_HLA-B.High
NDUFS1	-9.1355	MHC-I high	K562_HLA-B.High
ATP6V1C2	-8.9748	MHC-I high	K562_HLA-B.High
NDUFB1	-9.116	MHC-I high	K562_HLA-B.High
ATP6V1G3	-8.9566	MHC-I high	K562_HLA-B.High
NDUFV3	-8.9841	MHC-I high	K562_HLA-B.High
COX7A2	-8.9165	MHC-I high	K562_HLA-B.High
NDUFB3	-8.3371	MHC-I high	K562_HLA-B.High
UQCRQ	-8.626	MHC-I high	K562_HLA-B.High
NDUFB2	-8.9569	MHC-I high	K562_HLA-B.High
TCIRG1	-8.5097	MHC-I high	K562_HLA-B.High
NDUFS2	-7.4785	MHC-I high	K562_HLA-B.High
ATP6AP1	-8.8791	MHC-I high	K562_HLA-B.High
ATP6V1A	-8.6475	MHC-I high	K562_HLA-B.High
COX7A2L	-8.9087	MHC-I high	K562_HLA-B.High
COX6B2	-8.9128	MHC-I high	K562_HLA-B.High
ATP6V1E1	-7.26	MHC-I high	K562_HLA-B.High
NDUFA1	-8.1662	MHC-I high	K562_HLA-B.High
ATP6V0A4	-8.9253	MHC-I high	K562_HLA-B.High
ATP6V0E2	-8.6558	MHC-I high	K562_HLA-B.High
NDUFA7	-8.9729	MHC-I high	K562_HLA-B.High
NDUFB6	-8.0034	MHC-I high	K562_HLA-B.High
NDUFS6	-8.8231	MHC-I high	K562_HLA-B.High
ATP6V1E2	-8.8623	MHC-I high	K562_HLA-B.High
NDUFA4L2	-8.5192	MHC-I high	K562_HLA-B.High
COX7A1	-8.8234	MHC-I high	K562_HLA-B.High
NDUFB10	-8.689	MHC-I high	K562_HLA-B.High
NDUFA8	-8.4807	MHC-I high	K562_HLA-B.High
NDUFA6	-8.4094	MHC-I high	K562_HLA-B.High
COX7B2	-8.6034	MHC-I high	K562_HLA-B.High
LHPP	-8.8872	MHC-I high	K562_HLA-B.High
NDUFC2	-8.3891	MHC-I high	K562_HLA-B.High
COX7B	-6.562	MHC-I high	K562_HLA-B.High
COX11	-8.5577	MHC-I high	K562_HLA-B.High
PPA2	-8.7003	MHC-I high	K562_HLA-B.High
COX10	-8.3092	MHC-I high	K562_HLA-B.High
NDUFB7	-8.5221	MHC-I high	K562_HLA-B.High
UQCRC1	-8.0045	MHC-I high	K562_HLA-B.High
UQCRH	-8.5831	MHC-I high	K562_HLA-B.High
NDUFB8	-8.425	MHC-I high	K562_HLA-B.High
SDHB	-8.7061	MHC-I high	K562_HLA-B.High
COX5A	-8.2115	MHC-I high	K562_HLA-B.High
NDUFS4	-8.5469	MHC-I high	K562_HLA-B.High
ATP6V0D2	-8.0741	MHC-I high	K562_HLA-B.High
COX5B	-8.486	MHC-I high	K562_HLA-B.High
ATP6V0C	-8.2482	MHC-I high	K562_HLA-B.High
UQCR10	-8.3602	MHC-I high	K562_HLA-B.High
COX4I2	-8.2298	MHC-I high	K562_HLA-B.High
NDUFS5	-8.0866	MHC-I high	K562_HLA-B.High
COX15	-7.7971	MHC-I high	K562_HLA-B.High
ATP6V0D1	-8.5551	MHC-I high	K562_HLA-B.High
UQCRFS1	-8.3721	MHC-I high	K562_HLA-B.High
NDUFA13	-7.8401	MHC-I high	K562_HLA-B.High
NDUFA11	-7.7575	MHC-I high	K562_HLA-B.High
COX8C	-8.8019	MHC-I high	K562_HLA-B.High
UQCR11	-8.4658	MHC-I high	K562_HLA-B.High
NDUFB9	-7.9107	MHC-I high	K562_HLA-B.High
COX6C	-8.2156	MHC-I high	K562_HLA-B.High
ATP6V0B	-7.9044	MHC-I high	K562_HLA-B.High
NDUFB11	-8.1899	MHC-I high	K562_HLA-B.High
COX4I1	-8.2691	MHC-I high	K562_HLA-B.High
NDUFA4	-7.3182	MHC-I high	K562_HLA-B.High
ATP6V1F	-8.456	MHC-I high	K562_HLA-B.High
UQCRB	-8.472	MHC-I high	K562_HLA-B.High
NDUFS7	-7.7955	MHC-I high	K562_HLA-B.High
NDUFA5	-8.2586	MHC-I high	K562_HLA-B.High
COX17	-7.3647	MHC-I high	K562_HLA-B.High
ATP6V1D	-7.5319	MHC-I high	K562_HLA-B.High
ATP6V1H	-8.3817	MHC-I high	K562_HLA-B.High
SDHD	-8.4253	MHC-I high	K562_HLA-B.High
NDUFA12	-8.1673	MHC-I high	K562_HLA-B.High
NDUFV1	-8.0713	MHC-I high	K562_HLA-B.High
ATP6V0A1	-7.8162	MHC-I high	K562_HLA-B.High
ATP6V1G1	-7.8251	MHC-I high	K562_HLA-B.High
NDUFS8	-8.0779	MHC-I high	K562_HLA-B.High
NDUFC2-KCTD14	-6.1003	MHC-I high	K562_HLA-B.High
COX8A	-7.134	MHC-I high	K562_HLA-B.High
COX7C	-6.239	MHC-I high	K562_HLA-B.High
NDUFAB1	-9.3454	MHC-I high	K562_panMHCI.High
ATP12A	-9.8466	MHC-I high	K562_panMHCI.High
ATP6V1B1	-9.5944	MHC-I high	K562_panMHCI.High
NDUFA3	-9.7411	MHC-I high	K562_panMHCI.High
NDUFA10	-9.2239	MHC-I high	K562_panMHCI.High
ATP6V0E1	-8.4281	MHC-I high	K562_panMHCI.High
ATP4A	-8.7007	MHC-I high	K562_panMHCI.High
NDUFV2	-9.4509	MHC-I high	K562_panMHCI.High
NDUFC1	-9.1922	MHC-I high	K562_panMHCI.High
NDUFB4	-9.5219	MHC-I high	K562_panMHCI.High
ATP4B	-9.4487	MHC-I high	K562_panMHCI.High
PPA1	-9.5146	MHC-I high	K562_panMHCI.High
NDUFS3	-9.0423	MHC-I high	K562_panMHCI.High
COX6A1	-8.7272	MHC-I high	K562_panMHCI.High
ATP6V0A2	-9.3738	MHC-I high	K562_panMHCI.High
NDUFA9	-8.8362	MHC-I high	K562_panMHCI.High
ATP6V1C1	-9.4715	MHC-I high	K562_panMHCI.High
COX6A2	-8.9315	MHC-I high	K562_panMHCI.High
CYC1	-8.8827	MHC-I high	K562_panMHCI.High
NDUFB5	-8.9021	MHC-I high	K562_panMHCI.High
ATP6V1G2	-9.3385	MHC-I high	K562_panMHCI.High
UQCRC2	-8.1143	MHC-I high	K562_panMHCI.High
ATP6V1B2	-8.1308	MHC-I high	K562_panMHCI.High
NDUFA2	-7.8678	MHC-I high	K562_panMHCI.High
SDHA	-9.1727	MHC-I high	K562_panMHCI.High
COX6B1	-8.497	MHC-I high	K562_panMHCI.High
SDHC	-9.2882	MHC-I high	K562_panMHCI.High
NDUFS1	-9.2609	MHC-I high	K562_panMHCI.High
ATP6V1C2	-9.1003	MHC-I high	K562_panMHCI.High
NDUFA5	-7.7267	MHC-I high	K562_panMHCI.High
NDUFB1	-9.2415	MHC-I high	K562_panMHCI.High
ATP6V1G3	-9.082	MHC-I high	K562_panMHCI.High
NDUFV3	-8.387	MHC-I high	K562_panMHCI.High
UQCRQ	-8.7513	MHC-I high	K562_panMHCI.High
NDUFB3	-8.4624	MHC-I high	K562_panMHCI.High
UQCRC1	-8.4349	MHC-I high	K562_panMHCI.High
NDUFB2	-9.0823	MHC-I high	K562_panMHCI.High
COX7A2	-8.7908	MHC-I high	K562_panMHCI.High
TCIRG1	-8.6351	MHC-I high	K562_panMHCI.High
NDUFS2	-8.3498	MHC-I high	K562_panMHCI.High
ATP6V1A	-8.7728	MHC-I high	K562_panMHCI.High
ATP6AP1	-9.0046	MHC-I high	K562_panMHCI.High
COX7A2L	-9.0341	MHC-I high	K562_panMHCI.High
COX6B2	-8.7519	MHC-I high	K562_panMHCI.High
ATP6V1E1	-7.3849	MHC-I high	K562_panMHCI.High
NDUFA1	-8.2914	MHC-I high	K562_panMHCI.High
ATP6V0A4	-8.6891	MHC-I high	K562_panMHCI.High
ATP6V0E2	-9.0414	MHC-I high	K562_panMHCI.High
NDUFA7	-8.3994	MHC-I high	K562_panMHCI.High
NDUFB6	-8.1286	MHC-I high	K562_panMHCI.High
NDUFS6	-8.9486	MHC-I high	K562_panMHCI.High
ATP6V1E2	-8.7878	MHC-I high	K562_panMHCI.High
NDUFA4L2	-8.8363	MHC-I high	K562_panMHCI.High
COX7A1	-8.9901	MHC-I high	K562_panMHCI.High
NDUFB10	-8.8144	MHC-I high	K562_panMHCI.High
NDUFA8	-8.606	MHC-I high	K562_panMHCI.High
NDUFA6	-8.6717	MHC-I high	K562_panMHCI.High
COX7B2	-8.7288	MHC-I high	K562_panMHCI.High
LHPP	-9.0127	MHC-I high	K562_panMHCI.High
NDUFC2	-8.3142	MHC-I high	K562_panMHCI.High
COX7B	-7.7815	MHC-I high	K562_panMHCI.High
COX11	-8.4776	MHC-I high	K562_panMHCI.High
ATP6V1H	-8.6292	MHC-I high	K562_panMHCI.High
PPA2	-8.8257	MHC-I high	K562_panMHCI.High
COX10	-8.4345	MHC-I high	K562_panMHCI.High
NDUFB7	-8.6474	MHC-I high	K562_panMHCI.High
UQCRH	-8.7084	MHC-I high	K562_panMHCI.High
NDUFB8	-7.8931	MHC-I high	K562_panMHCI.High
SDHB	-8.8315	MHC-I high	K562_panMHCI.High
COX5A	-8.3367	MHC-I high	K562_panMHCI.High
NDUFS4	-8.4733	MHC-I high	K562_panMHCI.High
ATP6V0D2	-8.1993	MHC-I high	K562_panMHCI.High
COX5B	-8.6113	MHC-I high	K562_panMHCI.High
ATP6V0C	-8.3735	MHC-I high	K562_panMHCI.High
UQCR10	-8.0798	MHC-I high	K562_panMHCI.High
COX4I2	-8.3551	MHC-I high	K562_panMHCI.High
NDUFS5	-8.2118	MHC-I high	K562_panMHCI.High
COX15	-8.297	MHC-I high	K562_panMHCI.High
ATP6V0D1	-8.6804	MHC-I high	K562_panMHCI.High
UQCRFS1	-8.4974	MHC-I high	K562_panMHCI.High
NDUFA13	-7.9653	MHC-I high	K562_panMHCI.High
NDUFA11	-7.8826	MHC-I high	K562_panMHCI.High
COX8C	-8.9273	MHC-I high	K562_panMHCI.High
UQCR11	-8.5912	MHC-I high	K562_panMHCI.High
NDUFB9	-8.0359	MHC-I high	K562_panMHCI.High
COX6C	-8.3408	MHC-I high	K562_panMHCI.High
ATP6V0B	-8.0296	MHC-I high	K562_panMHCI.High
NDUFB11	-8.3152	MHC-I high	K562_panMHCI.High
COX4I1	-8.3214	MHC-I high	K562_panMHCI.High
NDUFA4	-7.4431	MHC-I high	K562_panMHCI.High
ATP6V1F	-8.5845	MHC-I high	K562_panMHCI.High
UQCRB	-8.5974	MHC-I high	K562_panMHCI.High
NDUFS7	-8.667	MHC-I high	K562_panMHCI.High
COX17	-7.4896	MHC-I high	K562_panMHCI.High
SDHD	-8.5506	MHC-I high	K562_panMHCI.High
NDUFA12	-8.194	MHC-I high	K562_panMHCI.High
NDUFV1	-8.1966	MHC-I high	K562_panMHCI.High
ATP6V0A1	-7.9414	MHC-I high	K562_panMHCI.High
ATP6V1G1	-7.9503	MHC-I high	K562_panMHCI.High
NDUFC2-KCTD14	-6.2241	MHC-I high	K562_panMHCI.High
NDUFS8	-8.2031	MHC-I high	K562_panMHCI.High
ATP6V1D	-8.0112	MHC-I high	K562_panMHCI.High
COX8A	-7.2588	MHC-I high	K562_panMHCI.High
COX7C	-6.3629	MHC-I high	K562_panMHCI.High

## Sheet: TableS5
S5: Bipotent TFCRs of angiogenesis
TFCR	Regulatory module affinity	Immune module estimate	Immune module P value	Regulatory module P value	Immune module P value (adjusted)	Regulatory module P value (adjusted)
BATF	0.561161	-0.598541	0	2.00093e-39	0	4.00186e-39
EBF1	0.561848	-0.175838	1.35233e-142	2.17212e-49	1.57772e-142	7.60241e-49
IRF4	0.550687	-0.951402	0	1.31276e-34	0	2.29733e-34
JMJD1C	0.56302	0.113129	3.38211e-147	1.30178e-44	4.30451e-147	3.03748e-44
LYL1	0.554902	-0.38749	0	3.23745e-56	0	1.51081e-55
MED12	0.537642	0.13598	7.92265e-290	7.52016e-09	1.23241e-289	8.09863e-09
NFYC	0.545506	0.163888	0	1.15056e-05	0	1.15056e-05
RELA	0.543697	0.137447	1.29305e-302	0	2.26284e-302	0
RUNX1	0.538349	-0.1001	7.65585e-61	7.46229e-232	8.24476e-61	5.2236e-231
SND1	0.559477	0.152145	4.72301e-273	7.67415e-26	6.61221e-273	1.07438e-25
SPIB	0.556989	-0.986076	0	3.41216e-27	0	5.3078e-27
TBX21	0.576736	-1.05393	0	5.19004e-48	0	1.45321e-47
TCF21	0.5554	-0.249246	9.29647e-42	6.96837e-24	9.29647e-42	8.86883e-24
TFDP1	0.530062	0.169418	1.84831869945633e-314	3.08557e-20	3.69663739891267e-314	3.59983e-20

## Sheet: TableS6
S6: Bipotent TFCRs of evasion of growth repressors
TFCR	Regulatory module affinity	Immune module estimate	Immune module P value	Regulatory module P value	Immune module P value (adjusted)	Regulatory module P value (adjusted)
CCNT2	0.556542	0.186962	0	1.90505e-07	0	1.90505e-07
FOXA1	0.578562	0.231746	1.13549e-35	0	1.44516e-35	0
FOXH1	0.579229	0.348524	2.78743e-91	1.62223e-13	4.878e-91	1.8926e-13
GLIS1	0.580952	-0.142567	1.90015e-24	6.16714e-36	2.04631e-24	8.63399e-36
JUN	0.569821	0.0922993	4.26971e-45	1.19788e-142	5.9776e-45	4.19257e-142
MAX	0.557294	-0.0224113	1.79939e-10	6.17688e-93	1.79939e-10	1.44127e-92
MAZ	0.570483	0.216526	0	2.34554e-45	0	3.64862e-45
RUNX3	0.580842	-0.657165	0	1.86481e-12	0	2.00825e-12
RXRA	0.555483	0.163666	5.00192e-261	1.82022e-58	1.40054e-260	3.18539e-58
SMC1A	0.558912	0.116054	4.27514e-174	5.4014e-198	9.97533e-174	2.52065e-197
TEAD1	0.591678	0.136088	8.55872e-164	1.99097e-72	1.71174e-163	3.98193e-72
TFAP2A	0.604718	0.195609	3.91932e-65	4.68413e-123	6.09672e-65	1.31156e-122
TP63	0.595602	-0.157044	1.18456e-28	0	1.38198e-28	0
TTF1	0.58381	0.138683	0	1.60922e-20	0	2.04809e-20

## Sheet: TableS7
S7: Datasets included in Methods sections.
Method section	Datasets included in the analysis
2.4.1 Regulation module	21,000 ChIP-seq samples in Cistrome database(120)
2.4.2.1 Immune module (bulk level)	~11,000 patients in TCGA data
2.4.2.2 Immune module (single-cell level)	GSE103322, GSE72056, EMTAB6149 GSE117570, and GSE127465
2.5.1.1 Validation of metabolic roles	~ 570 knockdown/knockout experiments in KnockTF database(54)
2.5.1.2 Validation of immune roles	CRISPR screen was obtained from (55)
2.5.2 Validation of metabolic TFCRs using single-cell ATAC-seq data:	single-cell ATACseq dataset of skin cancer (46)
2.10 Association of expression of antigen presentation genes and ESRRA activity	1000 Cancer Cell Line Encyclopedia (CCLE) data and ~11,000 patients in TCGA data
2.11 Analysis of immune-related CRISPR screens	six MHC-I screens from (63–66), eight T-cell coculture screens from (55,68–71)
2.12 Analysis of immune infiltration in tumors	39 tumor patient cohorts in PRECOG database, and ~11,000 patients in TCGA data
2.13 Immune features associations with ESRRA activity	348 bladder cancer patients (121)
2.16 Single-cell analysis of public datasets	30 scRNA-seq cohorts in TISCH (74), and Single-cell ATACseq data was downloaded from (46)
2.18 Analysis of macrophage polarization	CD45+ single-cells from melanoma patients (88)
