# Supplementary figures and images for: Discovery of Targets for Immune–Metabolic Antitumor Drugs Identifies Estrogen-Related Receptor Alpha
Source: PubMed Central journal article supplement — Cancer Discov. 2023 Feb 6;13(3):672–701. doi: 10.1158/2159-8290.CD-22-0244 (PMC9975674; doi:10.1158/2159-8290.cd-22-0244), 2023-02-06

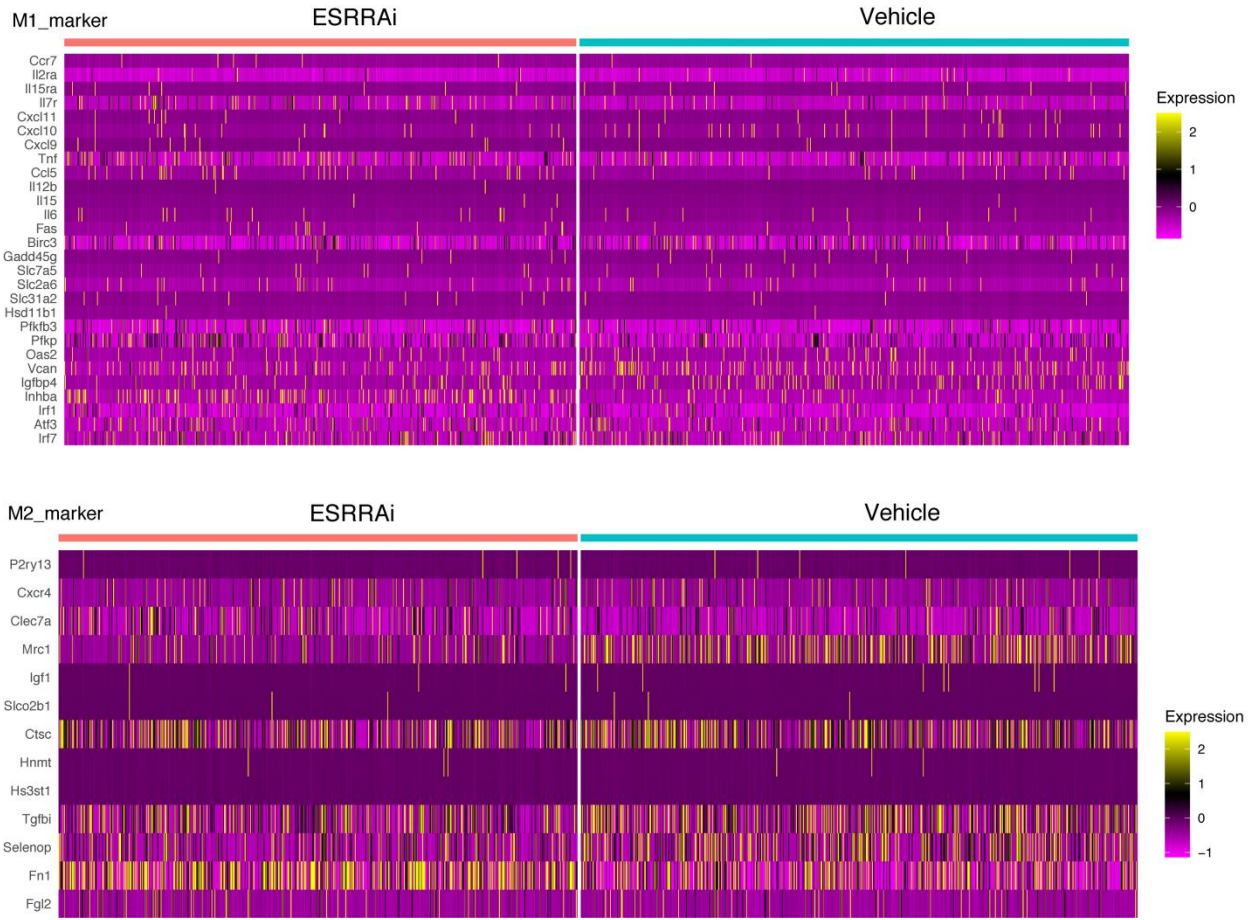

Fig. S19. Expression of markers of M1 and M2 in scRNA data of ESRRAi and Vehicle treated mice.

Supplement: cd-22-0244_figure_s19_suppsf19.pdf [file cd-22-0244_figure_s19_suppsf19.pdf]
